# Supplementary material
Source: PubMed Central journal article supplement (PMC10356168)
Supplement: jasn-34-1241-s001.pdf [file jasn-34-1241-s001.pdf]

## Supplemental material

**Supplemental Table S1.** Definition of study covariates.

| <b>Comorbidities</b>    | <b>ICD-10 codes</b>                                                                                                                                | <b>ATC codes</b> |
|-------------------------|----------------------------------------------------------------------------------------------------------------------------------------------------|------------------|
| Cardiovascular disease* | I200, I21-I22, I201, I208, I209, I24, I25, I110, I130, I132, I50, I60-I64, I693, I698, I694, I65-I69, G45 (excl G454), G46, I44-I49, I70, I72, I73 |                  |
| Hypertension            | I10-I15                                                                                                                                            |                  |
| Diabetes mellitus       | E10-E14                                                                                                                                            | A10              |
| Cancer                  | C00-C43, C45-C97                                                                                                                                   |                  |
| Liver disease           | B18, I982, K70-K77                                                                                                                                 |                  |

\* Cardiovascular disease was defined as a composite of myocardial infarction, other ischemic heart disease, heart failure, stroke, other cerebrovascular disease, arrhythmia and peripheral vascular disease.

**Supplemental Table S2.** P<sub>10</sub> of different CKD-EPI eGFR equations stratified by the magnitude and direction of the discordance between eGFR<sub>cr</sub> and eGFR<sub>cys</sub>.

|                        | eGFR <sub>cys</sub> <eGFR <sub>cr</sub> *              | eGFR <sub>cys</sub> ≈ eGFR <sub>cr</sub> *           | eGFR <sub>cys</sub> >eGFR <sub>cr</sub> *               |
|------------------------|--------------------------------------------------------|------------------------------------------------------|---------------------------------------------------------|
|                        | eGFR <sub>cys</sub> >20% lower than eGFR <sub>cr</sub> | eGFR <sub>cys</sub> within 20% of eGFR <sub>cr</sub> | eGFR <sub>cys</sub> >20% higher than eGFR <sub>cr</sub> |
| eGFR <sub>cr</sub>     | 15.8 (14.7 to 16.9)                                    | 42.4 (40.9 to 43.9)                                  | 34.1 (30.6 to 37.6)                                     |
| eGFR <sub>cys</sub>    | 24.0 (22.8 to 25.3)                                    | 46.7 (45.2 to 48.2)                                  | 25.9 (22.8 to 29.2)                                     |
| eGFR <sub>cr-cys</sub> | 40.2 (38.8 to 41.7)                                    | 43.2 (41.8 to 44.6)                                  | 43.9 (40.3 to 47.4)                                     |

Cr = creatinine; cys = cystatin C; eGFR = estimated glomerular filtration rate; mGFR = measured glomerular filtration rate.

\* A measurement fell within eGFR<sub>cys</sub><eGFR<sub>cr</sub> when eGFR<sub>cys</sub> was more than 20% *lower* than eGFR<sub>cr</sub>; eGFR<sub>cys</sub>≈eGFR<sub>cr</sub> if the difference between eGFR values was within 20% of eGFR<sub>cr</sub>; and within eGFR<sub>cys</sub>>eGFR<sub>cr</sub> when eGFR<sub>cys</sub> was more than 20% *higher* than eGFR<sub>cr</sub>

P<sub>10</sub> was defined as the percentage of individuals with estimated GFRs within 10% of measured GFR (95% confidence interval).

eGFR was calculated using the CKD-EPI 2012 and 2021 equations.

**Supplemental Table S3.** Agreement between mGFR and eGFR categories stratified by discordance between eGFR<sub>cr</sub> and eGFR<sub>cys</sub>: given a certain eGFR category, what is the probability an individual is in a certain mGFR category.

|                                                          | eGFR <sub>cys</sub> < eGFR <sub>cr</sub><br>eGFR <sub>cys</sub> > 20% lower than eGFR <sub>cr</sub> |                    |                   |                   |                   |                  |             |
|----------------------------------------------------------|-----------------------------------------------------------------------------------------------------|--------------------|-------------------|-------------------|-------------------|------------------|-------------|
|                                                          | mGFR, mL/min/1.73m <sup>2</sup> (%)                                                                 |                    |                   |                   |                   |                  |             |
|                                                          | ≥90                                                                                                 | 60-89              | 45-59             | 30-44             | 15-29             | <15              | Total       |
| <b>eGFR<sub>cr</sub>, mL/min/1.73m<sup>2</sup></b>       |                                                                                                     |                    |                   |                   |                   |                  |             |
| ≥90                                                      | <b>372 (27.5)</b>                                                                                   | 834 (61.7)         | 125 (9.2)         | 16 (1.2)          | 3 (0.2)           | 2 (0.1)          | 1352 (30.3) |
| 60-89                                                    | 7 (0.5)                                                                                             | <b>561 (39.8)</b>  | 620 (43.9)        | 198 (14)          | 23 (1.6)          | 2 (0.1)          | 1411 (31.6) |
| 45-59                                                    |                                                                                                     | 14 (1.9)           | <b>232 (30.8)</b> | 403 (53.5)        | 99 (13.1)         | 5 (0.7)          | 753 (16.9)  |
| 30-44                                                    |                                                                                                     | 3 (0.5)            | 22 (4)            | <b>253 (45.8)</b> | 259 (46.8)        | 16 (2.9)         | 553 (12.4)  |
| 15-29                                                    |                                                                                                     |                    | 2 (0.6)           | 26 (7.3)          | <b>252 (71)</b>   | 75 (21.1)        | 355 (8)     |
| <15                                                      |                                                                                                     |                    |                   | 1 (2.4)           | 11 (26.8)         | <b>29 (70.7)</b> | 41 (0.9)    |
| Total                                                    | 379 (8.5)                                                                                           | 1412 (31.6)        | 1001 (22.4)       | 897 (20.1)        | 647 (14.5)        | 129 (2.9)        | 4465 (100)  |
| <b>eGFR<sub>cys</sub>, mL/min/1.73m<sup>2</sup></b>      |                                                                                                     |                    |                   |                   |                   |                  |             |
| ≥90                                                      | <b>59 (73.8)</b>                                                                                    | 20 (25)            | 1 (1.2)           |                   |                   |                  | 80 (1.8)    |
| 60-89                                                    | 267 (27.6)                                                                                          | <b>645 (66.7)</b>  | 51 (5.3)          | 2 (0.2)           | 2 (0.2)           |                  | 967 (21.7)  |
| 45-59                                                    | 43 (4.5)                                                                                            | 531 (55.1)         | <b>346 (35.9)</b> | 44 (4.6)          |                   |                  | 964 (21.6)  |
| 30-44                                                    | 7 (0.6)                                                                                             | 193 (16.5)         | 505 (43.1)        | <b>436 (37.2)</b> | 29 (2.5)          | 2 (0.2)          | 1172 (26.2) |
| 15-29                                                    | 3 (0.3)                                                                                             | 23 (2.3)           | 90 (9.1)          | 400 (40.6)        | <b>441 (44.8)</b> | 28 (2.8)         | 985 (22.1)  |
| <15                                                      |                                                                                                     |                    | 8 (2.7)           | 15 (5.1)          | 175 (58.9)        | <b>99 (33.3)</b> | 297 (6.7)   |
| <b>eGFR<sub>crea-cys</sub>, mL/min/1.73m<sup>2</sup></b> |                                                                                                     |                    |                   |                   |                   |                  |             |
| ≥90                                                      | <b>212 (57.1)</b>                                                                                   | 157 (42.3)         | 2 (0.5)           |                   |                   |                  | 371 (8.3)   |
| 60-89                                                    | 159 (10.7)                                                                                          | <b>1025 (68.8)</b> | 283 (19)          | 20 (1.3)          | 3 (0.2)           |                  | 1490 (33.4) |
| 45-59                                                    | 7 (0.8)                                                                                             | 207 (22.2)         | <b>506 (54.4)</b> | 208 (22.3)        | 2 (0.2)           | 1 (0.1)          | 931 (20.9)  |
| 30-44                                                    | 1 (0.1)                                                                                             | 21 (2.4)           | 195 (22.3)        | <b>507 (58)</b>   | 143 (16.4)        | 7 (0.8)          | 874 (19.6)  |
| 15-29                                                    |                                                                                                     | 2 (0.3)            | 15 (2.3)          | 157 (24)          | <b>430 (65.8)</b> | 49 (7.5)         | 653 (14.6)  |
| <15                                                      |                                                                                                     |                    |                   | 5 (3.4)           | 69 (47.3)         | <b>72 (49.3)</b> | 146 (3.3)   |
|                                                          | eGFR <sub>cys</sub> ≈ eGFR <sub>cr</sub><br>eGFR <sub>cys</sub> within 20% of eGFR <sub>cr</sub>    |                    |                   |                   |                   |                  |             |
|                                                          | mGFR, mL/min/1.73m <sup>2</sup> (%)                                                                 |                    |                   |                   |                   |                  |             |
|                                                          | ≥90                                                                                                 | 60-89              | 45-59             | 30-44             | 15-29             | <15              | Total       |
| <b>eGFR<sub>cr</sub>, mL/min/1.73m<sup>2</sup></b>       |                                                                                                     |                    |                   |                   |                   |                  |             |
| ≥90                                                      | <b>1110 (64)</b>                                                                                    | 615 (35.4)         | 8 (0.5)           |                   | 2 (0.1)           |                  | 1735 (41.1) |
| 60-89                                                    | 101 (8.3)                                                                                           | <b>871 (72)</b>    | 214 (17.7)        | 23 (1.9)          | 1 (0.1)           |                  | 1210 (28.6) |
| 45-59                                                    |                                                                                                     | 89 (16.6)          | <b>313 (58.3)</b> | 134 (25)          | 1 (0.2)           |                  | 537 (12.7)  |
| 30-44                                                    |                                                                                                     | 4 (1.1)            | 67 (19.2)         | <b>220 (63)</b>   | 57 (16.3)         | 1 (0.3)          | 349 (8.3)   |
| 15-29                                                    |                                                                                                     |                    |                   | 31 (11.5)         | <b>209 (77.7)</b> | 29 (10.8)        | 269 (6.4)   |
| <15                                                      |                                                                                                     |                    |                   | 1 (0.8)           | 38 (30.2)         | <b>87 (69)</b>   | 126 (3)     |
| Total                                                    | 1211 (28.7)                                                                                         | 1579 (37.4)        | 602 (14.2)        | 409 (9.7)         | 308 (7.3)         | 117 (2.8)        | 4226 (100)  |
| <b>eGFR<sub>cys</sub>, mL/min/1.73m<sup>2</sup></b>      |                                                                                                     |                    |                   |                   |                   |                  |             |
| ≥90                                                      | <b>1036 (69)</b>                                                                                    | 462 (30.8)         | 2 (0.1)           |                   | 1 (0.1)           |                  | 1501 (35.5) |
| 60-89                                                    | 175 (13.5)                                                                                          | <b>971 (75)</b>    | 136 (10.5)        | 11 (0.8)          | 2 (0.2)           |                  | 1295 (30.6) |
| 45-59                                                    |                                                                                                     | 140 (23.9)         | <b>352 (60.1)</b> | 94 (16)           |                   |                  | 586 (13.9)  |
| 30-44                                                    |                                                                                                     | 6 (1.5)            | 111 (27.8)        | <b>247 (61.9)</b> | 34 (8.5)          | 1 (0.3)          | 399 (9.4)   |
| 15-29                                                    |                                                                                                     |                    | 1 (0.3)           | 56 (18.1)         | <b>227 (73.5)</b> | 25 (8.1)         | 309 (7.3)   |
| <15                                                      |                                                                                                     |                    |                   | 1 (0.7)           | 44 (32.4)         | <b>91 (66.9)</b> | 136 (3.2)   |
| <b>eGFR<sub>crea-cys</sub>, mL/min/1.73m<sup>2</sup></b> |                                                                                                     |                    |                   |                   |                   |                  |             |

|                                                          |                    |                   |                  |                   |                   |                   |              |
|----------------------------------------------------------|--------------------|-------------------|------------------|-------------------|-------------------|-------------------|--------------|
| ≥90                                                      | <b>1139 (64.2)</b> | 629 (35.4)        | 5 (0.3)          |                   | 2 (0.1)           |                   | 1775 (42)    |
| 60-89                                                    | 72 (6.4)           | <b>863 (76.2)</b> | 182 (16.1)       | 15 (1.3)          | 1 (0.1)           |                   | 1133 (26.8)  |
| 45-59                                                    |                    | 83 (15.4)         | <b>339 (63)</b>  | 116 (21.6)        |                   |                   | 538 (12.7)   |
| 30-44                                                    |                    | 4 (1.1)           | 76 (20.9)        | <b>238 (65.6)</b> | 44 (12.1)         | 1 (0.3)           | 363 (8.6)    |
| 15-29                                                    |                    |                   |                  | 39 (13.8)         | <b>219 (77.7)</b> | 24 (8.5)          | 282 (6.7)    |
| <15                                                      |                    |                   |                  | 1 (0.7)           | 42 (31.1)         | <b>92 (68.1)</b>  | 135 (3.2)    |
| <b>eGFR<sub>cys</sub>&gt;eGFR<sub>cr</sub></b>           |                    |                   |                  |                   |                   |                   |              |
| eGFR <sub>cys</sub> >20% higher than eGFR <sub>cr</sub>  |                    |                   |                  |                   |                   |                   |              |
| <b>mGFR, mL/min/1.73m<sup>2</sup> (%)</b>                |                    |                   |                  |                   |                   |                   |              |
|                                                          | <b>≥90</b>         | <b>60-89</b>      | <b>45-59</b>     | <b>30-44</b>      | <b>15-29</b>      | <b>&lt;15</b>     | <b>Total</b> |
| <b>eGFR<sub>cr</sub>, mL/min/1.73m<sup>2</sup></b>       |                    |                   |                  |                   |                   |                   |              |
| ≥90                                                      | <b>49 (69)</b>     | 22 (31)           |                  |                   |                   |                   | 71 (10)      |
| 60-89                                                    | 115 (38.2)         | <b>178 (59.1)</b> | 6 (2)            | 2 (0.7)           |                   |                   | 301 (42.2)   |
| 45-59                                                    | 1 (1.1)            | 51 (58)           | <b>34 (38.6)</b> | 1 (1.1)           |                   | 1 (1.1)           | 88 (12.3)    |
| 30-44                                                    |                    | 3 (4.7)           | 31 (48.4)        | <b>27 (42.2)</b>  | 3 (4.7)           |                   | 64 (9)       |
| 15-29                                                    |                    |                   | 3 (6.2)          | 8 (16.7)          | <b>37 (77.1)</b>  |                   | 48 (6.7)     |
| <15                                                      |                    |                   |                  |                   | 25 (17.7)         | <b>116 (82.3)</b> | 141 (19.8)   |
| Total                                                    | 165 (23.1)         | 254 (35.6)        | 74 (10.4)        | 38 (5.3)          | 65 (9.1)          | 117 (16.4)        | 713 (100)    |
| <b>eGFR<sub>cys</sub>, mL/min/1.73m<sup>2</sup></b>      |                    |                   |                  |                   |                   |                   |              |
| ≥90                                                      | <b>160 (51.3)</b>  | 149 (47.8)        | 2 (0.6)          |                   |                   | 1 (0.3)           | 312 (43.8)   |
| 60-89                                                    | 5 (3.4)            | <b>102 (69.9)</b> | 34 (23.3)        | 4 (2.7)           | 1 (0.7)           |                   | 146 (20.5)   |
| 45-59                                                    |                    | 3 (6.1)           | <b>32 (65.3)</b> | 13 (26.5)         | 1 (2)             |                   | 49 (6.9)     |
| 30-44                                                    |                    |                   | 6 (15.8)         | <b>20 (52.6)</b>  | 10 (26.3)         | 2 (5.3)           | 38 (5.3)     |
| 15-29                                                    |                    |                   |                  | 1 (1.3)           | <b>49 (62.8)</b>  | 28 (35.9)         | 78 (10.9)    |
| <15                                                      |                    |                   |                  |                   | 4 (4.4)           | <b>86 (95.6)</b>  | 90 (12.6)    |
| <b>eGFR<sub>crea-cys</sub>, mL/min/1.73m<sup>2</sup></b> |                    |                   |                  |                   |                   |                   |              |
| ≥90                                                      | <b>143 (59.6)</b>  | 97 (40.4)         |                  |                   |                   |                   | 240 (33.7)   |
| 60-89                                                    | 22 (11.3)          | <b>149 (76.8)</b> | 19 (9.8)         | 3 (1.5)           |                   | 1 (0.5)           | 194 (27.2)   |
| 45-59                                                    |                    | 8 (14.3)          | <b>42 (75)</b>   | 5 (8.9)           | 1 (1.8)           |                   | 56 (7.9)     |
| 30-44                                                    |                    |                   | 12 (30)          | <b>24 (60)</b>    | 4 (10)            |                   | 40 (5.6)     |
| 15-29                                                    |                    |                   | 1 (1.7)          | 6 (10)            | <b>46 (76.7)</b>  | 7 (11.7)          | 60 (8.4)     |
| <15                                                      |                    |                   |                  |                   | 14 (11.4)         | <b>109 (88.6)</b> | 123 (17.3)   |

**Percentages add up to 100% from left to right.** Empty cells denote that there were no individuals in that category.

**Supplemental Table S4.** Agreement between mGFR and eGFR categories stratified by discordance between eGFR<sub>cr</sub> and eGFR<sub>cys</sub>: given a certain mGFR category, what is the probability an individual is in a certain eGFR category.

|                                                          | eGFR <sub>cys</sub> < eGFR <sub>cr</sub><br>eGFR <sub>cys</sub> > 20% lower than eGFR <sub>cr</sub> |                    |                   |                   |                   |                  |             |
|----------------------------------------------------------|-----------------------------------------------------------------------------------------------------|--------------------|-------------------|-------------------|-------------------|------------------|-------------|
|                                                          | mGFR, mL/min/1.73m <sup>2</sup> (%)                                                                 |                    |                   |                   |                   |                  |             |
|                                                          | ≥90                                                                                                 | 60-89              | 45-59             | 30-44             | 15-29             | <15              | Total       |
| <b>eGFR<sub>cr</sub>, mL/min/1.73m<sup>2</sup></b>       |                                                                                                     |                    |                   |                   |                   |                  |             |
| ≥90                                                      | <b>372 (98.2)</b>                                                                                   | 834 (59.1)         | 125 (12.5)        | 16 (1.8)          | 3 (0.5)           | 2 (1.6)          | 1352 (30.3) |
| 60-89                                                    | 7 (1.8)                                                                                             | <b>561 (39.7)</b>  | 620 (61.9)        | 198 (22.1)        | 23 (3.6)          | 2 (1.6)          | 1411 (31.6) |
| 45-59                                                    |                                                                                                     | 14 (1)             | <b>232 (23.2)</b> | 403 (44.9)        | 99 (15.3)         | 5 (3.9)          | 753 (16.9)  |
| 30-44                                                    |                                                                                                     | 3 (0.2)            | 22 (2.2)          | <b>253 (28.2)</b> | 259 (40)          | 16 (12.4)        | 553 (12.4)  |
| 15-29                                                    |                                                                                                     |                    | 2 (0.2)           | 26 (2.9)          | <b>252 (38.9)</b> | 75 (58.1)        | 355 (8)     |
| <15                                                      |                                                                                                     |                    |                   | 1 (0.1)           | 11 (1.7)          | <b>29 (22.5)</b> | 41 (0.9)    |
| Total                                                    | 379 (8.5)                                                                                           | 1412 (31.6)        | 1001 (22.4)       | 897 (20.1)        | 647 (14.5)        | 129 (2.9)        | 4465 (100)  |
| <b>eGFR<sub>cys</sub>, mL/min/1.73m<sup>2</sup></b>      |                                                                                                     |                    |                   |                   |                   |                  |             |
| ≥90                                                      | <b>59 (15.6)</b>                                                                                    | 20 (1.4)           | 1 (0.1)           |                   |                   |                  | 80 (1.8)    |
| 60-89                                                    | 267 (70.4)                                                                                          | <b>645 (45.7)</b>  | 51 (5.1)          | 2 (0.2)           | 2 (0.3)           |                  | 967 (21.7)  |
| 45-59                                                    | 43 (11.3)                                                                                           | 531 (37.6)         | <b>346 (34.6)</b> | 44 (4.9)          |                   |                  | 964 (21.6)  |
| 30-44                                                    | 7 (1.8)                                                                                             | 193 (13.7)         | 505 (50.4)        | <b>436 (48.6)</b> | 29 (4.5)          | 2 (1.6)          | 1172 (26.2) |
| 15-29                                                    | 3 (0.8)                                                                                             | 23 (1.6)           | 90 (9)            | 400 (44.6)        | <b>441 (68.2)</b> | 28 (21.7)        | 985 (22.1)  |
| <15                                                      |                                                                                                     |                    | 8 (0.8)           | 15 (1.7)          | 175 (27)          | <b>99 (76.7)</b> | 297 (6.7)   |
| <b>eGFR<sub>crea-cys</sub>, mL/min/1.73m<sup>2</sup></b> |                                                                                                     |                    |                   |                   |                   |                  |             |
| ≥90                                                      | <b>212 (55.9)</b>                                                                                   | 157 (11.1)         | 2 (0.2)           |                   |                   |                  | 371 (8.3)   |
| 60-89                                                    | 159 (42)                                                                                            | <b>1025 (72.6)</b> | 283 (28.3)        | 20 (2.2)          | 3 (0.5)           |                  | 1490 (33.4) |
| 45-59                                                    | 7 (1.8)                                                                                             | 207 (14.7)         | <b>506 (50.5)</b> | 208 (23.2)        | 2 (0.3)           | 1 (0.8)          | 931 (20.9)  |
| 30-44                                                    | 1 (0.3)                                                                                             | 21 (1.5)           | 195 (19.5)        | <b>507 (56.5)</b> | 143 (22.1)        | 7 (5.4)          | 874 (19.6)  |
| 15-29                                                    |                                                                                                     | 2 (0.1)            | 15 (1.5)          | 157 (17.5)        | <b>430 (66.5)</b> | 49 (38)          | 653 (14.6)  |
| <15                                                      |                                                                                                     |                    |                   | 5 (0.6)           | 69 (10.7)         | <b>72 (55.8)</b> | 146 (3.3)   |
|                                                          | eGFR <sub>cys</sub> ≈ eGFR <sub>cr</sub><br>eGFR <sub>cys</sub> within 20% of eGFR <sub>cr</sub>    |                    |                   |                   |                   |                  |             |
|                                                          | mGFR, mL/min/1.73m <sup>2</sup> (%)                                                                 |                    |                   |                   |                   |                  |             |
|                                                          | ≥90                                                                                                 | 60-89              | 45-59             | 30-44             | 15-29             | <15              | Total       |
| <b>eGFR<sub>cr</sub>, mL/min/1.73m<sup>2</sup></b>       |                                                                                                     |                    |                   |                   |                   |                  |             |
| ≥90                                                      | <b>1110 (91.7)</b>                                                                                  | 615 (38.9)         | 8 (1.3)           |                   | 2 (0.6)           |                  | 1735 (41.1) |
| 60-89                                                    | 101 (8.3)                                                                                           | <b>871 (55.2)</b>  | 214 (35.5)        | 23 (5.6)          | 1 (0.3)           |                  | 1210 (28.6) |
| 45-59                                                    |                                                                                                     | 89 (5.6)           | <b>313 (52)</b>   | 134 (32.8)        | 1 (0.3)           |                  | 537 (12.7)  |
| 30-44                                                    |                                                                                                     | 4 (0.3)            | 67 (11.1)         | <b>220 (53.8)</b> | 57 (18.5)         | 1 (0.9)          | 349 (8.3)   |
| 15-29                                                    |                                                                                                     |                    |                   | 31 (7.6)          | <b>209 (67.9)</b> | 29 (24.8)        | 269 (6.4)   |
| <15                                                      |                                                                                                     |                    |                   | 1 (0.2)           | 38 (12.3)         | <b>87 (74.4)</b> | 126 (3)     |
| Total                                                    | 1211 (28.7)                                                                                         | 1579 (37.4)        | 602 (14.2)        | 409 (9.7)         | 308 (7.3)         | 117 (2.8)        | 4226 (100)  |
| <b>eGFR<sub>cys</sub>, mL/min/1.73m<sup>2</sup></b>      |                                                                                                     |                    |                   |                   |                   |                  |             |
| ≥90                                                      | <b>1036 (85.5)</b>                                                                                  | 462 (29.3)         | 2 (0.3)           |                   | 1 (0.3)           |                  | 1501 (35.5) |
| 60-89                                                    | 175 (14.5)                                                                                          | <b>971 (61.5)</b>  | 136 (22.6)        | 11 (2.7)          | 2 (0.6)           |                  | 1295 (30.6) |
| 45-59                                                    |                                                                                                     | 140 (8.9)          | <b>352 (58.5)</b> | 94 (23)           |                   |                  | 586 (13.9)  |
| 30-44                                                    |                                                                                                     | 6 (0.4)            | 111 (18.4)        | <b>247 (60.4)</b> | 34 (11)           | 1 (0.9)          | 399 (9.4)   |
| 15-29                                                    |                                                                                                     |                    | 1 (0.2)           | 56 (13.7)         | <b>227 (73.7)</b> | 25 (21.4)        | 309 (7.3)   |
| <15                                                      |                                                                                                     |                    |                   | 1 (0.2)           | 44 (14.3)         | <b>91 (77.8)</b> | 136 (3.2)   |
| <b>eGFR<sub>crea-cys</sub>, mL/min/1.73m<sup>2</sup></b> |                                                                                                     |                    |                   |                   |                   |                  |             |

|                                                          |                    |                   |                   |                   |                   |                   |              |
|----------------------------------------------------------|--------------------|-------------------|-------------------|-------------------|-------------------|-------------------|--------------|
| ≥90                                                      | <b>1139 (94.1)</b> | 629 (39.8)        | 5 (0.8)           |                   | 2 (0.6)           |                   | 1775 (42)    |
| 60-89                                                    | 72 (5.9)           | <b>863 (54.7)</b> | 182 (30.2)        | 15 (3.7)          | 1 (0.3)           |                   | 1133 (26.8)  |
| 45-59                                                    |                    | 83 (5.3)          | <b>339 (56.3)</b> | 116 (28.4)        |                   |                   | 538 (12.7)   |
| 30-44                                                    |                    | 4 (0.3)           | 76 (12.6)         | <b>238 (58.2)</b> | 44 (14.3)         | 1 (0.9)           | 363 (8.6)    |
| 15-29                                                    |                    |                   |                   | 39 (9.5)          | <b>219 (71.1)</b> | 24 (20.5)         | 282 (6.7)    |
| <15                                                      |                    |                   |                   | 1 (0.2)           | 42 (13.6)         | <b>92 (78.6)</b>  | 135 (3.2)    |
| <b>eGFR<sub>cys</sub>&gt;eGFR<sub>cr</sub></b>           |                    |                   |                   |                   |                   |                   |              |
| eGFR <sub>cys</sub> >20% higher than eGFR <sub>cr</sub>  |                    |                   |                   |                   |                   |                   |              |
| <b>mGFR, mL/min/1.73m<sup>2</sup> (%)</b>                |                    |                   |                   |                   |                   |                   |              |
|                                                          | <b>≥90</b>         | <b>60-89</b>      | <b>45-59</b>      | <b>30-44</b>      | <b>15-29</b>      | <b>&lt;15</b>     | <b>Total</b> |
| <b>eGFR<sub>cr</sub>, mL/min/1.73m<sup>2</sup></b>       |                    |                   |                   |                   |                   |                   |              |
| ≥90                                                      | <b>49 (29.7)</b>   | 22 (8.7)          |                   |                   |                   |                   | 71 (10)      |
| 60-89                                                    | 115 (69.7)         | <b>178 (70.1)</b> | 6 (8.1)           | 2 (5.3)           |                   |                   | 301 (42.2)   |
| 45-59                                                    | 1 (0.6)            | 51 (20.1)         | <b>34 (45.9)</b>  | 1 (2.6)           |                   | 1 (0.9)           | 88 (12.3)    |
| 30-44                                                    |                    | 3 (1.2)           | 31 (41.9)         | <b>27 (71.1)</b>  | 3 (4.6)           |                   | 64 (9)       |
| 15-29                                                    |                    |                   | 3 (4.1)           | 8 (21.1)          | <b>37 (56.9)</b>  |                   | 48 (6.7)     |
| <15                                                      |                    |                   |                   |                   | 25 (38.5)         | <b>116 (99.1)</b> | 141 (19.8)   |
| Total                                                    | 165 (23.1)         | 254 (35.6)        | 74 (10.4)         | 38 (5.3)          | 65 (9.1)          | 117 (16.4)        | 713 (100)    |
| <b>eGFR<sub>cys</sub>, mL/min/1.73m<sup>2</sup></b>      |                    |                   |                   |                   |                   |                   |              |
| ≥90                                                      | <b>160 (97)</b>    | 149 (58.7)        | 2 (2.7)           |                   |                   | 1 (0.9)           | 312 (43.8)   |
| 60-89                                                    | 5 (3)              | <b>102 (40.2)</b> | 34 (45.9)         | 4 (10.5)          | 1 (1.5)           |                   | 146 (20.5)   |
| 45-59                                                    |                    | 3 (1.2)           | <b>32 (43.2)</b>  | 13 (34.2)         | 1 (1.5)           |                   | 49 (6.9)     |
| 30-44                                                    |                    |                   | 6 (8.1)           | <b>20 (52.6)</b>  | 10 (15.4)         | 2 (1.7)           | 38 (5.3)     |
| 15-29                                                    |                    |                   |                   | 1 (2.6)           | <b>49 (75.4)</b>  | 28 (23.9)         | 78 (10.9)    |
| <15                                                      |                    |                   |                   |                   | 4 (6.2)           | <b>86 (73.5)</b>  | 90 (12.6)    |
| <b>eGFR<sub>crea-cys</sub>, mL/min/1.73m<sup>2</sup></b> |                    |                   |                   |                   |                   |                   |              |
| ≥90                                                      | <b>143 (86.7)</b>  | 97 (38.2)         |                   |                   |                   |                   | 240 (33.7)   |
| 60-89                                                    | 22 (13.3)          | <b>149 (58.7)</b> | 19 (25.7)         | 3 (7.9)           |                   | 1 (0.9)           | 194 (27.2)   |
| 45-59                                                    |                    | 8 (3.1)           | <b>42 (56.8)</b>  | 5 (13.2)          | 1 (1.5)           |                   | 56 (7.9)     |
| 30-44                                                    |                    |                   | 12 (16.2)         | <b>24 (63.2)</b>  | 4 (6.2)           |                   | 40 (5.6)     |
| 15-29                                                    |                    |                   | 1 (1.4)           | 6 (15.8)          | <b>46 (70.8)</b>  | 7 (6)             | 60 (8.4)     |
| <15                                                      |                    |                   |                   |                   | 14 (21.5)         | <b>109 (93.2)</b> | 123 (17.3)   |

**Percentages add up to 100% from top to bottom.** Empty cells denote that there were no individuals in that category.

**Supplemental Table S5.** Correct and incorrect reclassification from GFR categories based on eGFR<sub>cr</sub> or eGFR<sub>cys</sub> to categories based on eGFR<sub>cr-cys</sub>, in patients with eGFR<sub>cys</sub><eGFR<sub>cr</sub> and eGFR<sub>cys</sub>>eGFR<sub>cr</sub>.

|                                                | eGFR <sub>cys</sub> <eGFR <sub>cr</sub>                  |                   |                   |                   |                   |                   |             |
|------------------------------------------------|----------------------------------------------------------|-------------------|-------------------|-------------------|-------------------|-------------------|-------------|
|                                                | eGFR <sub>cys</sub> >20% lower than eGFR <sub>cr</sub>   |                   |                   |                   |                   |                   |             |
|                                                | eGFR <sub>crea-cys</sub> , mL/min/1.73m <sup>2</sup> (%) |                   |                   |                   |                   |                   |             |
| eGFR <sub>cr</sub> , mL/min/1.73m <sup>2</sup> | ≥90                                                      | 60-89             | 45-59             | 30-44             | 15-29             | <15               | Total       |
| <b>≥90</b>                                     |                                                          |                   |                   |                   |                   |                   |             |
| Total                                          | 371 (27.4)                                               | <b>904 (66.9)</b> | <b>69 (5.1)</b>   | <b>7 (0.5)</b>    | <b>1 (0.1)</b>    |                   | 1352 (30.3) |
| Correctly (re)classified                       | 212 (24)                                                 | <b>645 (73)</b>   | <b>25 (2.8)</b>   | <b>2 (0.2)</b>    | <b>0 (0)</b>      |                   | 884 (32.1)  |
| Incorrectly (re)classified                     | 159 (34)                                                 | <b>259 (55.3)</b> | <b>44 (9.4)</b>   | <b>5 (1.1)</b>    | <b>1 (0.2)</b>    |                   | 468 (27.3)  |
| <b>60-89</b>                                   |                                                          |                   |                   |                   |                   |                   |             |
| Total                                          |                                                          | 586 (41.5)        | <b>682 (48.3)</b> | <b>136 (9.6)</b>  | <b>7 (0.5)</b>    |                   | 1411 (31.6) |
| Correctly (re)classified                       |                                                          | 380 (46.9)        | <b>378 (46.7)</b> | <b>49 (6)</b>     | <b>3 (0.4)</b>    |                   | 810 (29.4)  |
| Incorrectly (re)classified                     |                                                          | 206 (34.3)        | <b>304 (50.6)</b> | <b>87 (14.5)</b>  | <b>4 (0.7)</b>    |                   | 601 (35.1)  |
| <b>45-59</b>                                   |                                                          |                   |                   |                   |                   |                   |             |
| Total                                          |                                                          |                   | 180 (23.9)        | <b>533 (70.8)</b> | <b>40 (5.3)</b>   |                   | 753 (16.9)  |
| Correctly (re)classified                       |                                                          |                   | 103 (23.1)        | <b>323 (72.4)</b> | <b>20 (4.5)</b>   |                   | 446 (16.2)  |
| Incorrectly (re)classified                     |                                                          |                   | 77 (25.1)         | <b>210 (68.4)</b> | <b>20 (6.5)</b>   |                   | 307 (17.9)  |
| <b>30-44</b>                                   |                                                          |                   |                   |                   |                   |                   |             |
| Total                                          |                                                          |                   |                   | 198 (35.8)        | <b>354 (64)</b>   | <b>1 (0.2)</b>    | 553 (12.4)  |
| Correctly (re)classified                       |                                                          |                   |                   | 133 (38.6)        | <b>212 (61.4)</b> | <b>0 (0)</b>      | 345 (12.5)  |
| Incorrectly (re)classified                     |                                                          |                   |                   | 65 (31.2)         | <b>142 (68.3)</b> | <b>1 (0.5)</b>    | 208 (12.1)  |
| <b>15-29</b>                                   |                                                          |                   |                   |                   |                   |                   |             |
| Total                                          |                                                          |                   |                   |                   | 251 (70.7)        | <b>104 (29.3)</b> | 355 (8)     |
| Correctly (re)classified                       |                                                          |                   |                   |                   | 195 (81.9)        | <b>43 (18.1)</b>  | 238 (8.6)   |
| Incorrectly (re)classified                     |                                                          |                   |                   |                   | 56 (47.9)         | <b>61 (52.1)</b>  | 117 (6.8)   |
| <b>&lt;15</b>                                  |                                                          |                   |                   |                   |                   |                   |             |
| Total                                          |                                                          |                   |                   |                   |                   | 41 (100)          | 41 (0.9)    |
| Correctly (re)classified                       |                                                          |                   |                   |                   |                   | 29 (100)          | 29 (1.1)    |
| Incorrectly (re)classified                     |                                                          |                   |                   |                   |                   | 12 (100)          | 12 (0.07)   |
| <b>Total</b>                                   |                                                          |                   |                   |                   |                   |                   |             |
| Total                                          | 371 (8.3)                                                | 1490 (33.4)       | 931 (20.9)        | 874 (19.6)        | 653 (14.6)        | 146 (3.3)         | 4465 (100)  |
| Correctly (re)classified                       | 212 (7.7)                                                | 1025 (37.2)       | 506 (18.4)        | 507 (18.4)        | 430 (15.6)        | 72 (2.6)          | 2752 (100)  |
| Incorrectly (re)classified                     | 159 (9.3)                                                | 465 (27.1)        | 425 (24.8)        | 367 (21.4)        | 223 (13.0)        | 74 (4.3)          | 1713 (100)  |

**eGFR<sub>cys</sub>>eGFR<sub>cr</sub>**  
eGFR<sub>cys</sub> >20% higher than eGFR<sub>cr</sub>

| eGFR <sub>cr</sub> , mL/min/1.73m <sup>2</sup> | eGFR <sub>crea-cys</sub> , mL/min/1.73m <sup>2</sup> (%) |                  |                  |                 |                  |            | Total      |
|------------------------------------------------|----------------------------------------------------------|------------------|------------------|-----------------|------------------|------------|------------|
|                                                | ≥90                                                      | 60-89            | 45-59            | 30-44           | 15-29            | <15        |            |
| <b>≥90</b>                                     |                                                          |                  |                  |                 |                  |            |            |
| Total                                          | 71 (100)                                                 |                  |                  |                 |                  |            | 71 (10)    |
| Correctly (re)classified                       | 49 (100)                                                 |                  |                  |                 |                  |            | 49 (9.6)   |
| Incorrectly (re)classified                     | 22 (100)                                                 |                  |                  |                 |                  |            | 22 (11.0)  |
| <b>60-89</b>                                   |                                                          |                  |                  |                 |                  |            |            |
| Total                                          | <b>169 (56.1)</b>                                        | 132 (43.9)       |                  |                 |                  |            | 301 (42.2) |
| Correctly (re)classified                       | <b>94 (47.7)</b>                                         | 103 (52.3)       |                  |                 |                  |            | 197 (38.4) |
| Incorrectly (re)classified                     | <b>75 (72.1)</b>                                         | 29 (27.9)        |                  |                 |                  |            | 104 (52.0) |
| <b>45-59</b>                                   |                                                          |                  |                  |                 |                  |            |            |
| Total                                          |                                                          | <b>61 (69.3)</b> | 27 (30.7)        |                 |                  |            | 88 (12.3)  |
| Correctly (re)classified                       |                                                          | <b>45 (68.2)</b> | 21 (31.8)        |                 |                  |            | 66 (12.9)  |
| Incorrectly (re)classified                     |                                                          | <b>16 (72.7)</b> | 6 (27.3)         |                 |                  |            | 22 (11.0)  |
| <b>30-44</b>                                   |                                                          |                  |                  |                 |                  |            |            |
| Total                                          |                                                          | <b>1 (1.6)</b>   | <b>29 (45.3)</b> | 34 (53.1)       |                  |            | 64 (9)     |
| Correctly (re)classified                       |                                                          | <b>1 (2.3)</b>   | <b>21 (47.7)</b> | 22 (50)         |                  |            | 44 (8.6)   |
| Incorrectly (re)classified                     |                                                          | <b>0 (0)</b>     | <b>8 (40)</b>    | 12 (60)         |                  |            | 20 (10.0)  |
| <b>15-29</b>                                   |                                                          |                  |                  |                 |                  |            |            |
| Total                                          |                                                          |                  |                  | <b>6 (12.5)</b> | 42 (87.5)        |            | 48 (6.7)   |
| Correctly (re)classified                       |                                                          |                  |                  | <b>2 (5.4)</b>  | 35 (94.6)        |            | 37 (7.2)   |
| Incorrectly (re)classified                     |                                                          |                  |                  | <b>4 (36.4)</b> | 7 (63.6)         |            | 11 (5.5)   |
| <b>&lt;15</b>                                  |                                                          |                  |                  |                 |                  |            |            |
| Total                                          |                                                          |                  |                  |                 | <b>18 (12.8)</b> | 123 (87.2) | 141 (19.8) |
| Correctly (re)classified                       |                                                          |                  |                  |                 | <b>11 (9.2)</b>  | 109 (90.8) | 120 (23.4) |
| Incorrectly (re)classified                     |                                                          |                  |                  |                 | <b>7 (33.3)</b>  | 14 (66.7)  | 21 (10.5)  |
| <b>Total</b>                                   |                                                          |                  |                  |                 |                  |            |            |
| Total                                          | 240 (33.7)                                               | 194 (27.2)       | 56 (7.9)         | 40 (5.6)        | 60 (8.4)         | 123 (17.3) | 713 (100)  |
| Correctly (re)classified                       | 143 (27.9)                                               | 149 (29.0)       | 42 (8.2)         | 24 (4.7)        | 46 (9.0)         | 109 (21.2) | 513 (100)  |
| Incorrectly (re)classified                     | 97 (48.5)                                                | 45 (22.5)        | 14 (7.0)         | 16 (8.0)        | 14 (7.0)         | 14 (7.0)   | 200 (100)  |

Among individuals with eGFR<sub>cys</sub><eGFR<sub>cr</sub>, using eGFR<sub>cr-cys</sub> instead of eGFR<sub>cr</sub> reclassified 2838/4465 (63.6%) individuals to a more severe eGFR category, of which 1700/4465 (38.1%) were correctly reclassified and 1138/4465 (25.5%) were incorrectly reclassified. Among individuals with eGFR<sub>cys</sub>>eGFR<sub>cr</sub>, using eGFR<sub>cr-cys</sub> instead of eGFR<sub>cr</sub> reclassified 284/713 (39.8%) individuals to a less severe eGFR category, of which 174/713 (24.4%) were correctly reclassified and 110/713 (15.4%) were incorrectly reclassified. Empty cells denote that there were no individuals in that particular eGFR category. Cells in bold show reclassified individuals.



|                                                     | eGFR <sub>cys</sub> < eGFR <sub>cr</sub>               |                   |                   |                   |                   |            |             |
|-----------------------------------------------------|--------------------------------------------------------|-------------------|-------------------|-------------------|-------------------|------------|-------------|
|                                                     | eGFR <sub>cys</sub> >20% lower than eGFR <sub>cr</sub> |                   |                   |                   |                   |            |             |
|                                                     | eGFR <sub>crea-cys</sub> mL/min/1.73m <sup>2</sup> (%) |                   |                   |                   |                   |            |             |
|                                                     | ≥90                                                    | 60-89             | 45-59             | 30-44             | 15-29             | <15        | Total       |
| <b>eGFR<sub>cys</sub>, mL/min/1.73m<sup>2</sup></b> |                                                        |                   |                   |                   |                   |            |             |
| <b>≥90</b>                                          |                                                        |                   |                   |                   |                   |            |             |
| Total                                               | 80 (100)                                               |                   |                   |                   |                   |            | 80 (1.8)    |
| Correctly (re)classified                            | 59 (100)                                               |                   |                   |                   |                   |            | 59 (2.1)    |
| Incorrectly (re)classified                          | 21 (100)                                               |                   |                   |                   |                   |            | 21 (1.2)    |
| <b>60-89</b>                                        |                                                        |                   |                   |                   |                   |            |             |
| Total                                               | <b>291 (30.1)</b>                                      | 676 (69.9)        |                   |                   |                   |            | 967 (21.7)  |
| Correctly (re)classified                            | <b>153 (23.1)</b>                                      | 508 (76.9)        |                   |                   |                   |            | 661 (24.0)  |
| Incorrectly (re)classified                          | <b>138 (45.1)</b>                                      | 168 (54.9)        |                   |                   |                   |            | 306 (17.9)  |
| <b>45-59</b>                                        |                                                        |                   |                   |                   |                   |            |             |
| Total                                               |                                                        | <b>736 (76.3)</b> | 228 (23.7)        |                   |                   |            | 964 (21.6)  |
| Correctly (re)classified                            |                                                        | <b>464 (78)</b>   | 131 (22)          |                   |                   |            | 595 (21.6)  |
| Incorrectly (re)classified                          |                                                        | <b>272 (73.7)</b> | 97 (26.3)         |                   |                   |            | 369 (21.5)  |
| <b>30-44</b>                                        |                                                        |                   |                   |                   |                   |            |             |
| Total                                               |                                                        | <b>78 (6.7)</b>   | <b>669 (57.1)</b> | 425 (36.3)        |                   |            | 1172 (26.2) |
| Correctly (re)classified                            |                                                        | <b>53 (7.8)</b>   | <b>363 (53.5)</b> | 262 (38.6)        |                   |            | 678 (24.6)  |
| Incorrectly (re)classified                          |                                                        | <b>25 (5.1)</b>   | <b>306 (61.9)</b> | 163 (33)          |                   |            | 494 (28.8)  |
| <b>15-29</b>                                        |                                                        |                   |                   |                   |                   |            |             |
| Total                                               |                                                        |                   | <b>34 (3.5)</b>   | <b>448 (45.5)</b> | 503 (51.1)        |            | 985 (22.1)  |
| Correctly (re)classified                            |                                                        |                   | <b>12 (2.1)</b>   | <b>245 (42.2)</b> | 324 (55.8)        |            | 581 (21.1)  |
| Incorrectly (re)classified                          |                                                        |                   | <b>22 (5.4)</b>   | <b>203 (50.2)</b> | 179 (44.3)        |            | 404 (23.6)  |
| <b>&lt;15</b>                                       |                                                        |                   |                   |                   |                   |            |             |
| Total                                               |                                                        |                   |                   | <b>1 (0.3)</b>    | <b>150 (50.5)</b> | 146 (49.2) | 297 (6.7)   |
| Correctly (re)classified                            |                                                        |                   |                   | <b>0 (0)</b>      | <b>106 (59.6)</b> | 72 (40.4)  | 178 (6.5)   |
| Incorrectly (re)classified                          |                                                        |                   |                   | <b>1 (0.8)</b>    | <b>44 (37)</b>    | 74 (62.2)  | 119 (6.9)   |
| <b>Total</b>                                        |                                                        |                   |                   |                   |                   |            |             |
| Total                                               | 371 (8.3)                                              | 1490 (33.4)       | 931 (20.9)        | 874 (19.6)        | 653 (14.6)        | 146 (3.3)  | 4465 (100)  |
| Correctly (re)classified                            | 212 (7.7)                                              | 1025 (37.2)       | 506 (18.4)        | 507 (18.4)        | 430 (15.6)        | 72 (2.6)   | 2752 (100)  |
| Incorrectly (re)classified                          | 159 (9.3)                                              | 465 (27.1)        | 425 (24.8)        | 367 (21.4)        | 223 (13.0)        | 74 (4.3)   | 1713 (100)  |

| eGFR <sub>cys</sub> , mL/min/1.73m <sup>2</sup> | eGFR <sub>cys</sub> >eGFR <sub>cr</sub><br>eGFR <sub>cys</sub> >20% higher than eGFR <sub>cr</sub> |                  |                  |                  |                  |                  | Total      |
|-------------------------------------------------|----------------------------------------------------------------------------------------------------|------------------|------------------|------------------|------------------|------------------|------------|
|                                                 | eGFR <sub>crea-cys</sub> , mL/min/1.73m <sup>2</sup> (%)                                           |                  |                  |                  |                  |                  |            |
|                                                 | ≥90                                                                                                | 60-89            | 45-59            | 30-44            | 15-29            | <15              |            |
| <b>≥90</b>                                      |                                                                                                    |                  |                  |                  |                  |                  |            |
| Total                                           | 240 (76.9)                                                                                         | <b>72 (23.1)</b> |                  |                  |                  |                  | 312 (43.8) |
| Correctly (re)classified                        | 143 (73.3)                                                                                         | <b>52 (26.7)</b> |                  |                  |                  |                  | 195 (38.0) |
| Incorrectly (re)classified                      | 97 (82.9)                                                                                          | <b>20 (17.1)</b> |                  |                  |                  |                  | 117 (58.5) |
| <b>60-89</b>                                    |                                                                                                    |                  |                  |                  |                  |                  |            |
| Total                                           |                                                                                                    | 122 (83.6)       | <b>24 (16.4)</b> |                  |                  |                  | 146 (20.5) |
| Correctly (re)classified                        |                                                                                                    | 97 (85.1)        | <b>17 (14.9)</b> |                  |                  |                  | 114 (22.2) |
| Incorrectly (re)classified                      |                                                                                                    | 25 (78.1)        | <b>7 (21.9)</b>  |                  |                  |                  | 32 (16.0)  |
| <b>45-59</b>                                    |                                                                                                    |                  |                  |                  |                  |                  |            |
| Total                                           |                                                                                                    |                  | 32 (65.3)        | <b>17 (34.7)</b> |                  |                  | 49 (6.9)   |
| Correctly (re)classified                        |                                                                                                    |                  | 25 (73.5)        | <b>9 (26.5)</b>  |                  |                  | 34 (6.6)   |
| Incorrectly (re)classified                      |                                                                                                    |                  | 7 (46.7)         | <b>8 (53.3)</b>  |                  |                  | 15 (7.5)   |
| <b>30-44</b>                                    |                                                                                                    |                  |                  |                  |                  |                  |            |
| Total                                           |                                                                                                    |                  |                  | 23 (60.5)        | <b>15 (39.5)</b> |                  | 38 (5.3)   |
| Correctly (re)classified                        |                                                                                                    |                  |                  | 15 (68.2)        | <b>7 (31.8)</b>  |                  | 22 (4.3)   |
| Incorrectly (re)classified                      |                                                                                                    |                  |                  | 8 (50)           | <b>8 (50)</b>    |                  | 16 (8.0)   |
| <b>15-29</b>                                    |                                                                                                    |                  |                  |                  |                  |                  |            |
| Total                                           |                                                                                                    |                  |                  |                  | 45 (57.7)        | <b>33 (42.3)</b> | 78 (10.9)  |
| Correctly (re)classified                        |                                                                                                    |                  |                  |                  | 39 (62.9)        | <b>23 (37.1)</b> | 62 (12.1)  |
| Incorrectly (re)classified                      |                                                                                                    |                  |                  |                  | 6 (37.5)         | <b>10 (62.5)</b> | 16 (8.0)   |
| <b>&lt;15</b>                                   |                                                                                                    |                  |                  |                  |                  |                  |            |
| Total                                           |                                                                                                    |                  |                  |                  |                  | 90 (100)         | 90 (12.6)  |
| Correctly (re)classified                        |                                                                                                    |                  |                  |                  |                  | 86 (100)         | 86 (16.8)  |
| Incorrectly (re)classified                      |                                                                                                    |                  |                  |                  |                  | 4 (100)          | 4 (2.0)    |
| <b>Total</b>                                    |                                                                                                    |                  |                  |                  |                  |                  |            |
| Total                                           | 240 (33.7)                                                                                         | 194 (27.2)       | 56 (7.9)         | 40 (5.6)         | 60 (8.4)         | 123 (17.3)       | 713 (100)  |
| Correctly (re)classified                        | 143 (27.9)                                                                                         | 149 (29.0)       | 42 (8.2)         | 24 (4.7)         | 46 (9.0)         | 109 (21.2)       | 513 (100)  |
| Incorrectly (re)classified                      | 97 (48.5)                                                                                          | 45 (22.5)        | 14 (7.0)         | 16 (8.0)         | 14 (7.0)         | 14 (7.0)         | 200 (100)  |

Among individuals with eGFR<sub>cys</sub><eGFR<sub>cr</sub> using eGFR<sub>cr-cys</sub> instead of eGFR<sub>cys</sub> reclassified 2407/4465 (53.9%) to a less severe eGFR category, of which 1396/4465 (31.3%) were correctly reclassified and 1011/4465 (22.6%) were incorrectly reclassified. Among individuals with eGFR<sub>cys</sub>>eGFR<sub>cr</sub>, using eGFR<sub>cr-cys</sub> instead of eGFR<sub>cys</sub> reclassified 161/713 (22.6%) individuals to a more severe eGFR category, of which 108/713 (15.1%) were correctly reclassified and 53/713 (7.4%) were incorrectly reclassified. Empty cells denote that there were no individuals in that particular eGFR category. Empty cells denote that there were no individuals in that particular eGFR category. Cells in bold show reclassified individuals.

**Supplemental Table S6.** Bias, P<sub>30</sub>, and correct classification of eGFR<sub>cr</sub>, eGFR<sub>cys</sub> and eGFR<sub>cr-cys</sub>, across subgroups stratified by discordance between eGFR<sub>cr</sub> and eGFR<sub>cys</sub>.

|                                                      | Age <65 (N = 5835)                                    |                                                        |                                                      | Age ≥65 years (N = 3569)                              |                                                        |                                                      |
|------------------------------------------------------|-------------------------------------------------------|--------------------------------------------------------|------------------------------------------------------|-------------------------------------------------------|--------------------------------------------------------|------------------------------------------------------|
|                                                      | eGFR <sub>cys</sub> <eGFR <sub>cr</sub><br>(N = 2364) | eGFR <sub>cys</sub> ≈ eGFR <sub>cr</sub><br>(N = 2916) | eGFR <sub>cys</sub> >eGFR <sub>cr</sub><br>(N = 555) | eGFR <sub>cys</sub> <eGFR <sub>cr</sub><br>(N = 2101) | eGFR <sub>cys</sub> ≈ eGFR <sub>cr</sub><br>(N = 1310) | eGFR <sub>cys</sub> >eGFR <sub>cr</sub><br>(N = 158) |
| <b>eGFR<sub>cr</sub></b>                             |                                                       |                                                        |                                                      |                                                       |                                                        |                                                      |
| Bias, median difference (ml/min/1.73m <sup>2</sup> ) | 17.4 (16.5 to 18.2)                                   | 5.6 (4.9 to 6.1)                                       | -5.5 (-7 to -4.3)                                    | 13.2 (12.6 to 13.8)                                   | 2.9 (2.3 to 3.3)                                       | -3 (-3.7 to -2.2)                                    |
| P <sub>30</sub>                                      | 48.9 (46.9 to 50.9)                                   | 85.8 (84.5 to 87.1)                                    | 87.4 (84.5 to 90.1)                                  | 50.7 (48.6 to 52.8)                                   | 86.3 (84.4 to 88.1)                                    | 80.4 (74.1 to 86.6)                                  |
| Correct classification                               | 38.8 (36.9 to 40.8)                                   | 67.7 (65.9 to 69.3)                                    | 58.6 (54.5 to 62.6)                                  | 37.2 (35.1 to 39.2)                                   | 63.9 (61.3 to 66.5)                                    | 73.5 (66.4 to 80)                                    |
| <b>eGFR<sub>cys</sub></b>                            |                                                       |                                                        |                                                      |                                                       |                                                        |                                                      |
| Bias, median difference (ml/min/1.73m <sup>2</sup> ) | -9.2 (-9.9 to -8.6)                                   | 3.4 (3 to 4.1)                                         | 10.5 (8.8 to 12.2)                                   | -8.2 (-8.6 to -7.7)                                   | 0.1 (-0.4 to 0.6)                                      | 3.9 (3 to 5.1)                                       |
| P <sub>30</sub>                                      | 74.2 (72.4 to 76)                                     | 90.2 (89.1 to 91.2)                                    | 71.2 (67.4 to 74.9)                                  | 71.5 (69.6 to 73.4)                                   | 91 (89.4 to 92.5)                                      | 74.1 (67.1 to 80.8)                                  |
| Correct classification                               | 44.8 (42.8 to 46.8)                                   | 69.9 (68.2 to 71.5)                                    | 61 (56.9 to 65.1)                                    | 46 (43.9 to 48.1)                                     | 67.6 (65.1 to 70.2)                                    | 69.6 (62.2 to 76.8)                                  |
| <b>eGFR<sub>cr-cys</sub></b>                         |                                                       |                                                        |                                                      |                                                       |                                                        |                                                      |
| Bias, median difference (ml/min/1.73m <sup>2</sup> ) | 1 (0.5 to 1.3)                                        | 6.2 (5.6 to 6.8)                                       | 2.2 (1.5 to 3.1)                                     | 0.5 (0.1 to 0.8)                                      | 2.7 (2.1 to 3.4)                                       | 1 (0.1 to 2.1)                                       |
| P <sub>30</sub>                                      | 84.6 (83.1 to 86)                                     | 88.4 (87.3 to 89.6)                                    | 89.4 (86.8 to 91.9)                                  | 84.1 (82.5 to 85.6)                                   | 88 (86.2 to 89.8)                                      | 82.3 (76.1 to 88.1)                                  |
| Correct classification                               | 59.4 (57.4 to 61.4)                                   | 69.5 (67.8 to 71.1)                                    | 70.9 (67.2 to 74.7)                                  | 64.1 (62.1 to 66.1)                                   | 66 (63.4 to 68.5)                                      | 75.3 (68.5 to 82.1)                                  |
|                                                      | Male (N = 5653)                                       |                                                        |                                                      | Female (N = 3751)                                     |                                                        |                                                      |
|                                                      | eGFR <sub>cys</sub> <eGFR <sub>cr</sub><br>(N = 2784) | eGFR <sub>cys</sub> ≈ eGFR <sub>cr</sub><br>(N = 2466) | eGFR <sub>cys</sub> >eGFR <sub>cr</sub><br>(N = 403) | eGFR <sub>cys</sub> <eGFR <sub>cr</sub><br>(N = 1681) | eGFR <sub>cys</sub> ≈ eGFR <sub>cr</sub><br>(N = 1760) | eGFR <sub>cys</sub> >eGFR <sub>cr</sub><br>(N = 310) |
| <b>eGFR<sub>cr</sub></b>                             |                                                       |                                                        |                                                      |                                                       |                                                        |                                                      |
| Bias, median difference (ml/min/1.73m <sup>2</sup> ) | 15.6 (15 to 16.3)                                     | 4.1 (3.6 to 4.6)                                       | -4.3 (-5.3 to -3.5)                                  | 13.8 (13 to 14.7)                                     | 5 (4.4 to 5.8)                                         | -5 (-7 to -3.7)                                      |
| P <sub>30</sub>                                      | 48.6 (46.8 to 50.4)                                   | 86.5 (85.1 to 87.8)                                    | 85.9 (82.3 to 89.1)                                  | 51.6 (49.2 to 54)                                     | 85.3 (83.6 to 87)                                      | 85.8 (81.8 to 89.5)                                  |
| Correct classification                               | 37.9 (36.1 to 39.7)                                   | 67.5 (65.6 to 69.3)                                    | 63.3 (58.6 to 68)                                    | 38.3 (36 to 40.6)                                     | 65.1 (62.9 to 67.3)                                    | 60 (54.6 to 65.4)                                    |
| <b>eGFR<sub>cys</sub></b>                            |                                                       |                                                        |                                                      |                                                       |                                                        |                                                      |
| Bias, median difference (ml/min/1.73m <sup>2</sup> ) | -9 (-9.5 to -8.5)                                     | 1.7 (1.3 to 2.1)                                       | 7.9 (6.5 to 9.7)                                     | -8.1 (-8.7 to -7.5)                                   | 2.7 (2.1 to 3.3)                                       | 9.4 (7.4 to 11.6)                                    |
| P <sub>30</sub>                                      | 73.4 (71.7 to 75)                                     | 90.6 (89.4 to 91.7)                                    | 71.5 (66.9 to 75.9)                                  | 72.2 (70 to 74.2)                                     | 90.2 (88.8 to 91.6)                                    | 72.3 (67.2 to 77.2)                                  |
| Correct classification                               | 44.9 (43.1 to 46.8)                                   | 69.1 (67.3 to 70.9)                                    | 62 (57.2 to 66.7)                                    | 46.1 (43.8 to 48.5)                                   | 69.3 (67.1 to 71.5)                                    | 64.2 (58.8 to 69.6)                                  |
| <b>eGFR<sub>cr-cys</sub></b>                         |                                                       |                                                        |                                                      |                                                       |                                                        |                                                      |
| Bias, median difference (ml/min/1.73m <sup>2</sup> ) | 0.8 (0.5 to 1.2)                                      | 4.4 (3.8 to 5)                                         | 1.5 (0.7 to 2.2)                                     | 0.6 (0.2 to 1)                                        | 5.8 (5.1 to 6.6)                                       | 2.4 (1.5 to 3.4)                                     |
| P <sub>30</sub>                                      | 85.9 (84.6 to 87.2)                                   | 89.5 (88.3 to 90.8)                                    | 88.8 (85.6 to 91.8)                                  | 81.7 (79.8 to 83.5)                                   | 86.6 (85 to 88.2)                                      | 86.5 (82.5 to 90.2)                                  |
| Correct classification                               | 62.7 (61 to 64.5)                                     | 69.5 (67.7 to 71.3)                                    | 72.9 (68.6 to 77.3)                                  | 59.8 (57.5 to 62.1)                                   | 66.8 (64.6 to 69)                                      | 70.6 (65.5 to 75.5)                                  |

|                                                      | BMI <25 (N = 3877)                                    |                                                        |                                                      | BMI ≥25 (N = 3887)                                    |                                                        |                                                      |
|------------------------------------------------------|-------------------------------------------------------|--------------------------------------------------------|------------------------------------------------------|-------------------------------------------------------|--------------------------------------------------------|------------------------------------------------------|
|                                                      | eGFR <sub>cys</sub> <eGFR <sub>cr</sub><br>(N = 1836) | eGFR <sub>cys</sub> ≈ eGFR <sub>cr</sub><br>(N = 1733) | eGFR <sub>cys</sub> >eGFR <sub>cr</sub><br>(N = 308) | eGFR <sub>cys</sub> <eGFR <sub>cr</sub><br>(N = 1938) | eGFR <sub>cys</sub> ≈ eGFR <sub>cr</sub><br>(N = 1665) | eGFR <sub>cys</sub> >eGFR <sub>cr</sub><br>(N = 284) |
| <b>eGFR<sub>cr</sub></b>                             |                                                       |                                                        |                                                      |                                                       |                                                        |                                                      |
| Bias, median difference (ml/min/1.73m <sup>2</sup> ) | 15.6 (14.7 to 16.5)                                   | 5.6 (4.8 to 6.2)                                       | -4.7 (-6.1 to -3.5)                                  | 14 (13.4 to 14.6)                                     | 2.5 (1.9 to 3.1)                                       | -4.8 (-6.4 to -3.9)                                  |
| P <sub>30</sub>                                      | 49.2 (46.9 to 51.5)                                   | 85 (83.3 to 86.6)                                      | 87.7 (83.9 to 91.3)                                  | 52 (49.8 to 54.2)                                     | 87.3 (85.6 to 88.8)                                    | 82.7 (78.3 to 87)                                    |
| Correct classification                               | 36.9 (34.6 to 39.1)                                   | 65.3 (63.1 to 67.5)                                    | 62.7 (57.2 to 68.1)                                  | 38.6 (36.5 to 40.8)                                   | 66.7 (64.3 to 68.9)                                    | 62.7 (57.1 to 68.4)                                  |
| <b>eGFR<sub>cys</sub></b>                            |                                                       |                                                        |                                                      |                                                       |                                                        |                                                      |
| Bias, median difference (ml/min/1.73m <sup>2</sup> ) | -9.1 (-9.6 to -8.5)                                   | 3.1 (2.5 to 3.7)                                       | 11.9 (10.1 to 13.6)                                  | -8.3 (-8.8 to -7.9)                                   | 0.4 (-0.2 to 1)                                        | 5.2 (3.9 to 6.3)                                     |
| P <sub>30</sub>                                      | 72.4 (70.4 to 74.4)                                   | 89.8 (88.4 to 91.3)                                    | 69.5 (64.1 to 74.5)                                  | 72.8 (70.8 to 74.8)                                   | 91.1 (89.7 to 92.4)                                    | 78.1 (73.3 to 82.8)                                  |
| Correct classification                               | 44.3 (42.1 to 46.6)                                   | 69.4 (67.2 to 71.6)                                    | 60 (54.5 to 65.5)                                    | 45.6 (43.4 to 47.7)                                   | 67.2 (65 to 69.5)                                      | 69.7 (64.3 to 75)                                    |
| <b>eGFR<sub>cr-cys</sub></b>                         |                                                       |                                                        |                                                      |                                                       |                                                        |                                                      |
| Bias, median difference (ml/min/1.73m <sup>2</sup> ) | 0.7 (0.3 to 1.1)                                      | 6.6 (5.7 to 7.2)                                       | 3 (2 to 4.1)                                         | 0.7 (0.3 to 1.2)                                      | 2.5 (2 to 3)                                           | 0.1 (-0.6 to 0.7)                                    |
| P <sub>30</sub>                                      | 84.5 (82.8 to 86.1)                                   | 86.7 (85.1 to 88.3)                                    | 87.7 (83.9 to 91.3)                                  | 83.3 (81.6 to 84.9)                                   | 89.7 (88.2 to 91.1)                                    | 90.5 (86.8 to 93.8)                                  |
| Correct classification                               | 62 (59.8 to 64.3)                                     | 67.7 (65.5 to 69.8)                                    | 71.7 (66.7 to 76.6)                                  | 60.2 (58 to 62.4)                                     | 67.9 (65.6 to 70.2)                                    | 75.7 (70.7 to 80.6)                                  |
|                                                      | mGFR <60 ml/min/1.73m <sup>2</sup> (N = 4404)         |                                                        |                                                      | mGFR ≥60 ml/min/1.73m <sup>2</sup> (N = 5000)         |                                                        |                                                      |
|                                                      | eGFR <sub>cys</sub> <eGFR <sub>cr</sub><br>(N = 2674) | eGFR <sub>cys</sub> ≈ eGFR <sub>cr</sub><br>(N = 1436) | eGFR <sub>cys</sub> >eGFR <sub>cr</sub><br>(N = 294) | eGFR <sub>cys</sub> <eGFR <sub>cr</sub><br>(N = 1791) | eGFR <sub>cys</sub> ≈ eGFR <sub>cr</sub><br>(N = 2790) | eGFR <sub>cys</sub> >eGFR <sub>cr</sub><br>(N = 419) |
| <b>eGFR<sub>cr</sub></b>                             |                                                       |                                                        |                                                      |                                                       |                                                        |                                                      |
| Bias, median difference (ml/min/1.73m <sup>2</sup> ) | 13.4 (12.7 to 14)                                     | 2.9 (2.4 to 3.3)                                       | -2.5 (-3.1 to -2)                                    | 17.7 (16.7 to 18.5)                                   | 6 (5.3 to 6.6)                                         | -9.8 (-11.5 to -8.2)                                 |
| P <sub>30</sub>                                      | 40 (38.2 to 41.9)                                     | 79.7 (77.5 to 81.7)                                    | 77.2 (72.3 to 81.9)                                  | 64.2 (62 to 66.5)                                     | 89.2 (88 to 90.4)                                      | 91.9 (89.2 to 94.4)                                  |
| Correct classification                               | 28.6 (27 to 30.3)                                     | 57.7 (55.2 to 60.2)                                    | 72.8 (67.7 to 77.9)                                  | 52.1 (49.8 to 54.4)                                   | 71 (69.3 to 72.7)                                      | 54.2 (49.5 to 58.9)                                  |
| <b>eGFR<sub>cys</sub></b>                            |                                                       |                                                        |                                                      |                                                       |                                                        |                                                      |
| Bias, median difference (ml/min/1.73m <sup>2</sup> ) | -6.2 (-6.6 to -5.8)                                   | 0.9 (0.4 to 1.3)                                       | 3.8 (3 to 4.5)                                       | -15.3 (-15.8 to -14.5)                                | 3.5 (2.9 to 4.3)                                       | 15.4 (13.6 to 17.1)                                  |
| P <sub>30</sub>                                      | 72.1 (70.4 to 73.8)                                   | 86.1 (84.3 to 87.9)                                    | 67 (61.6 to 72.3)                                    | 74.1 (72.1 to 76.2)                                   | 92.6 (91.6 to 93.6)                                    | 75.2 (70.9 to 79.3)                                  |
| Correct classification                               | 49.5 (47.5 to 51.3)                                   | 63.8 (61.4 to 66.3)                                    | 63.6 (58 to 69.1)                                    | 39.3 (37 to 41.6)                                     | 71.9 (70.2 to 73.6)                                    | 62.5 (57.8 to 67.1)                                  |
| <b>eGFR<sub>cr-cys</sub></b>                         |                                                       |                                                        |                                                      |                                                       |                                                        |                                                      |
| Bias, median difference (ml/min/1.73m <sup>2</sup> ) | 1.3 (1 to 1.7)                                        | 1.8 (1.4 to 2.2)                                       | 0.5 (-0.2 to 0.9)                                    | -0.6 (-1.3 to 0.1)                                    | 7.7 (7.1 to 8.2)                                       | 4.9 (3.7 to 6.7)                                     |
| P <sub>30</sub>                                      | 78.3 (76.8 to 79.9)                                   | 84 (82.2 to 85.9)                                      | 85 (80.9 to 89)                                      | 93.2 (92.1 to 94.4)                                   | 90.5 (89.4 to 91.6)                                    | 89.7 (86.8 to 92.6)                                  |
| Correct classification                               | 56.7 (54.8 to 58.5)                                   | 61.8 (59.3 to 64.2)                                    | 75.1 (70.2 to 80)                                    | 69.1 (66.9 to 71.2)                                   | 71.8 (70 to 73.4)                                      | 69.7 (65.2 to 74)                                    |

|                                                      | No Diabetes (N = 6914)                                |                                                        |                                                      | Diabetes (N = 2490)                                   |                                                       |                                                      |
|------------------------------------------------------|-------------------------------------------------------|--------------------------------------------------------|------------------------------------------------------|-------------------------------------------------------|-------------------------------------------------------|------------------------------------------------------|
|                                                      | eGFR <sub>cys</sub> <eGFR <sub>cr</sub><br>(N = 2916) | eGFR <sub>cys</sub> ≈ eGFR <sub>cr</sub><br>(N = 3382) | eGFR <sub>cys</sub> >eGFR <sub>cr</sub><br>(N = 616) | eGFR <sub>cys</sub> <eGFR <sub>cr</sub><br>(N = 1549) | eGFR <sub>cys</sub> ≈ eGFR <sub>cr</sub><br>(N = 844) | eGFR <sub>cys</sub> >eGFR <sub>cr</sub><br>(N = 97)  |
| <b>eGFR<sub>cr</sub></b>                             |                                                       |                                                        |                                                      |                                                       |                                                       |                                                      |
| Bias, median difference (ml/min/1.73m <sup>2</sup> ) | 15.3 (14.8 to 15.9)                                   | 4.5 (4.1 to 5)                                         | -5.1 (-6.2 to -4.2)                                  | 14.4 (13.6 to 15.1)                                   | 4.2 (3.3 to 4.9)                                      | -2.7 (-3.7 to -1.8)                                  |
| P <sub>30</sub>                                      | 50 (48.2 to 51.8)                                     | 86.5 (85.3 to 87.6)                                    | 87.5 (84.8 to 90.1)                                  | 49.2 (46.7 to 51.6)                                   | 84 (81.5 to 86.5)                                     | 75.3 (66.3 to 83.3)                                  |
| Correct classification                               | 37.9 (36.1 to 39.6)                                   | 67 (65.4 to 68.5)                                      | 59.4 (55.6 to 63.3)                                  | 38.4 (36 to 40.9)                                     | 64.6 (61.3 to 67.8)                                   | 77.4 (68.8 to 85.3)                                  |
| <b>eGFR<sub>cys</sub></b>                            |                                                       |                                                        |                                                      |                                                       |                                                       |                                                      |
| Bias, median difference (ml/min/1.73m <sup>2</sup> ) | -9 (-9.5 to -8.4)                                     | 2.6 (2.1 to 3.1)                                       | 9.6 (8.2 to 11)                                      | -8.3 (-8.7 to -7.7)                                   | 0.6 (0.1 to 1.2)                                      | 3.9 (2.5 to 5.8)                                     |
| P <sub>30</sub>                                      | 72.8 (71.2 to 74.4)                                   | 90.7 (89.7 to 91.7)                                    | 72.1 (68.5 to 75.5)                                  | 73.1 (70.9 to 75.3)                                   | 89.3 (87.2 to 91.4)                                   | 70 (60.4 to 79.1)                                    |
| Correct classification                               | 44.5 (42.7 to 46.3)                                   | 70 (68.4 to 71.5)                                      | 62.6 (58.8 to 66.5)                                  | 47 (44.5 to 49.5)                                     | 66 (62.8 to 69.2)                                     | 64.9 (55.3 to 74.4)                                  |
| <b>eGFR<sub>cr-cys</sub></b>                         |                                                       |                                                        |                                                      |                                                       |                                                       |                                                      |
| Bias, median difference (ml/min/1.73m <sup>2</sup> ) | 0.8 (0.4 to 1.1)                                      | 5.4 (5 to 5.8)                                         | 2.2 (1.5 to 3.1)                                     | 0.7 (0.2 to 1.2)                                      | 3.4 (2.7 to 4.3)                                      | 0.7 (-0.3 to 1.7)                                    |
| P <sub>30</sub>                                      | 84 (82.6 to 85.3)                                     | 88.8 (87.7 to 89.9)                                    | 89.6 (87.2 to 91.9)                                  | 85 (83.2 to 86.7)                                     | 86.2 (83.9 to 88.6)                                   | 76.3 (67.6 to 84.7)                                  |
| Correct classification                               | 60.3 (58.6 to 62.1)                                   | 68.9 (67.3 to 70.4)                                    | 71.7 (68.2 to 75.3)                                  | 64.1 (61.7 to 66.4)                                   | 66.2 (63 to 69.4)                                     | 73.1 (64 to 81.7)                                    |
|                                                      | No CVD (N = 6617)                                     |                                                        |                                                      | CVD (N = 2787)                                        |                                                       |                                                      |
|                                                      | eGFR <sub>cys</sub> <eGFR <sub>cr</sub><br>(N = 2760) | eGFR <sub>cys</sub> ≈ eGFR <sub>cr</sub><br>(N = 3284) | eGFR <sub>cys</sub> >eGFR <sub>cr</sub><br>(N = 573) | eGFR <sub>cys</sub> <eGFR <sub>cr</sub><br>(N = 1705) | eGFR <sub>cys</sub> ≈ eGFR <sub>cr</sub><br>(N = 942) | eGFR <sub>cys</sub> >eGFR <sub>cr</sub><br>(N = 140) |
| <b>eGFR<sub>cr</sub></b>                             |                                                       |                                                        |                                                      |                                                       |                                                       |                                                      |
| Bias, median difference (ml/min/1.73m <sup>2</sup> ) | 15.6 (15 to 16.4)                                     | 4.7 (4.2 to 5.3)                                       | -5 (-6.3 to -4.2)                                    | 14.2 (13.5 to 14.7)                                   | 3.7 (3.2 to 4.3)                                      | -3.1 (-4.7 to -2.1)                                  |
| P <sub>30</sub>                                      | 51.7 (49.9 to 53.6)                                   | 86.7 (85.6 to 87.9)                                    | 86.9 (84.1 to 89.6)                                  | 46.5 (44.2 to 48.8)                                   | 83.3 (80.9 to 85.7)                                   | 81.5 (74.8 to 87.7)                                  |
| Correct classification                               | 39.3 (37.5 to 41.2)                                   | 68 (66.4 to 69.6)                                      | 59.9 (55.9 to 63.9)                                  | 36 (33.8 to 38.3)                                     | 61.1 (58.1 to 64.2)                                   | 70.1 (62.3 to 77.5)                                  |
| <b>eGFR<sub>cys</sub></b>                            |                                                       |                                                        |                                                      |                                                       |                                                       |                                                      |
| Bias, median difference (ml/min/1.73m <sup>2</sup> ) | -9.2 (-9.7 to -8.7)                                   | 2.7 (2.1 to 3.1)                                       | 9.8 (8.2 to 11.4)                                    | -7.9 (-8.4 to -7.4)                                   | 0.7 (0.1 to 1.2)                                      | 5.2 (3.2 to 6.6)                                     |
| P <sub>30</sub>                                      | 74.2 (72.6 to 75.9)                                   | 91.3 (90.2 to 92.2)                                    | 71.2 (67.5 to 74.9)                                  | 70.8 (68.6 to 72.9)                                   | 87.5 (85.4 to 89.6)                                   | 74.3 (66.9 to 81.4)                                  |
| Correct classification                               | 45.3 (43.4 to 47.1)                                   | 70.6 (69 to 72.1)                                      | 63.3 (59.3 to 67.3)                                  | 45.5 (43.2 to 47.9)                                   | 64.3 (61.3 to 67.3)                                   | 61.4 (53.2 to 69.4)                                  |
| <b>eGFR<sub>cr-cys</sub></b>                         |                                                       |                                                        |                                                      |                                                       |                                                       |                                                      |
| Bias, median difference (ml/min/1.73m <sup>2</sup> ) | 0.8 (0.4 to 1.1)                                      | 5.5 (5.1 to 6.1)                                       | 2.2 (1.5 to 3.1)                                     | 0.7 (0.2 to 1.2)                                      | 3.2 (2.2 to 4.1)                                      | 0.9 (-0.2 to 1.8)                                    |
| P <sub>30</sub>                                      | 85.9 (84.6 to 87.2)                                   | 89.3 (88.2 to 90.4)                                    | 88.8 (86.2 to 91.3)                                  | 81.7 (79.8 to 83.5)                                   | 84.8 (82.5 to 87.1)                                   | 83.6 (77.3 to 89.6)                                  |
| Correct classification                               | 61.8 (60 to 63.7)                                     | 69.8 (68.2 to 71.4)                                    | 72.1 (68.4 to 75.7)                                  | 61.3 (58.9 to 63.6)                                   | 63.4 (60.4 to 66.4)                                   | 71.4 (63.7 to 78.7)                                  |

|                                                      | No heart failure (N = 8430)                           |                                                        |                                                      | Heart failure (N = 974)                               |                                                       |                                                     |
|------------------------------------------------------|-------------------------------------------------------|--------------------------------------------------------|------------------------------------------------------|-------------------------------------------------------|-------------------------------------------------------|-----------------------------------------------------|
|                                                      | eGFR <sub>cys</sub> <eGFR <sub>cr</sub><br>(N = 3783) | eGFR <sub>cys</sub> ≈ eGFR <sub>cr</sub><br>(N = 3973) | eGFR <sub>cys</sub> >eGFR <sub>cr</sub><br>(N = 674) | eGFR <sub>cys</sub> <eGFR <sub>cr</sub><br>(N = 682)  | eGFR <sub>cys</sub> ≈ eGFR <sub>cr</sub><br>(N = 253) | eGFR <sub>cys</sub> >eGFR <sub>cr</sub><br>(N = 39) |
| <b>eGFR<sub>cr</sub></b>                             |                                                       |                                                        |                                                      |                                                       |                                                       |                                                     |
| Bias, median difference (ml/min/1.73m <sup>2</sup> ) | 15.6 (15.1 to 16.1)                                   | 4.5 (4.1 to 4.9)                                       | -4.7 (-5.5 to -4)                                    | 12 (11 to 13)                                         | 3.4 (2.3 to 4.7)                                      | -2.3 (-5.2 to -0.6)                                 |
| P <sub>30</sub>                                      | 50.4 (48.8 to 52)                                     | 86.5 (85.5 to 87.6)                                    | 86.2 (83.5 to 88.7)                                  | 46 (42.3 to 49.7)                                     | 77.1 (71.8 to 82.1)                                   | 79.6 (66 to 91.4)                                   |
| Correct classification                               | 38.2 (36.6 to 39.7)                                   | 66.9 (65.4 to 68.3)                                    | 61.3 (57.6 to 64.9)                                  | 37.5 (33.9 to 41.2)                                   | 60.5 (54.4 to 66.4)                                   | 71.9 (56.8 to 85.7)                                 |
| <b>eGFR<sub>cys</sub></b>                            |                                                       |                                                        |                                                      |                                                       |                                                       |                                                     |
| Bias, median difference (ml/min/1.73m <sup>2</sup> ) | -9 (-9.5 to -8.6)                                     | 2.2 (1.8 to 2.6)                                       | 8.7 (7.3 to 10.1)                                    | -7.2 (-7.8 to -6.5)                                   | 1.1 (-0.2 to 2.1)                                     | 6.7 (2.3 to 14.5)                                   |
| P <sub>30</sub>                                      | 73.9 (72.4 to 75.2)                                   | 91 (90.1 to 91.9)                                      | 72.4 (69 to 75.7)                                    | 67.8 (64.2 to 71.2)                                   | 81.1 (76 to 85.8)                                     | 61.5 (45.2 to 76.7)                                 |
| Correct classification                               | 45.3 (43.8 to 46.9)                                   | 69.9 (68.4 to 71.3)                                    | 63.3 (59.7 to 67)                                    | 45.6 (41.8 to 49.3)                                   | 58.5 (52.4 to 64.4)                                   | 56.3 (40.4 to 71.8)                                 |
| <b>eGFR<sub>cr-cys</sub></b>                         |                                                       |                                                        |                                                      |                                                       |                                                       |                                                     |
| Bias, median difference (ml/min/1.73m <sup>2</sup> ) | 0.8 (0.5 to 1.1)                                      | 5.1 (4.7 to 5.5)                                       | 1.8 (1.2 to 2.6)                                     | 0.4 (-0.2 to 1.1)                                     | 2.7 (1.4 to 4.4)                                      | 1.8 (-1.4 to 5.5)                                   |
| P <sub>30</sub>                                      | 85.7 (84.6 to 86.8)                                   | 88.9 (87.9 to 89.9)                                    | 88.6 (86.1 to 91)                                    | 76.5 (73.3 to 79.7)                                   | 79.5 (74.4 to 84.3)                                   | 74.3 (59.5 to 87.5)                                 |
| Correct classification                               | 61.8 (60.3 to 63.3)                                   | 68.9 (67.4 to 70.3)                                    | 72.1 (68.7 to 75.5)                                  | 60.7 (57.1 to 64.3)                                   | 60.1 (53.9 to 66)                                     | 69.1 (53.8 to 83.8)                                 |
|                                                      | No liver disease (N = 6883)                           |                                                        |                                                      | Liver disease (N = 2521)                              |                                                       |                                                     |
|                                                      | eGFR <sub>cys</sub> <eGFR <sub>cr</sub><br>(N = 2771) | eGFR <sub>cys</sub> ≈ eGFR <sub>cr</sub><br>(N = 3438) | eGFR <sub>cys</sub> >eGFR <sub>cr</sub><br>(N = 674) | eGFR <sub>cys</sub> <eGFR <sub>cr</sub><br>(N = 1694) | eGFR <sub>cys</sub> ≈ eGFR <sub>cr</sub><br>(N = 788) | eGFR <sub>cys</sub> >eGFR <sub>cr</sub><br>(N = 39) |
| <b>eGFR<sub>cr</sub></b>                             |                                                       |                                                        |                                                      |                                                       |                                                       |                                                     |
| Bias, median difference (ml/min/1.73m <sup>2</sup> ) | 13.6 (13 to 14.1)                                     | 3.6 (3.2 to 4.1)                                       | -4.8 (-5.6 to -4)                                    | 17.5 (16.7 to 18.3)                                   | 9.1 (7.9 to 9.9)                                      | -0.8 (-3.4 to 1.8)                                  |
| P <sub>30</sub>                                      | 52.1 (50.2 to 53.9)                                   | 87 (85.9 to 88.1)                                      | 85.5 (82.8 to 88)                                    | 45.9 (43.6 to 48.3)                                   | 81.4 (78.5 to 84)                                     | 92.2 (82.9 to 100)                                  |
| Correct classification                               | 40.1 (38.3 to 41.9)                                   | 67.7 (66.2 to 69.3)                                    | 61.5 (57.7 to 65.1)                                  | 34.7 (32.4 to 37)                                     | 61 (57.7 to 64.4)                                     | 69.1 (54.1 to 83.7)                                 |
| <b>eGFR<sub>cys</sub></b>                            |                                                       |                                                        |                                                      |                                                       |                                                       |                                                     |
| Bias, median difference (ml/min/1.73m <sup>2</sup> ) | -8.5 (-9 to -8.1)                                     | 2.1 (1.7 to 2.5)                                       | 8.2 (6.7 to 9.8)                                     | -8.9 (-9.5 to -8.4)                                   | 2 (1.4 to 2.7)                                        | 13.9 (7.7 to 19.2)                                  |
| P <sub>30</sub>                                      | 71.4 (69.7 to 73)                                     | 90.4 (89.4 to 91.4)                                    | 72.1 (68.7 to 75.5)                                  | 75.4 (73.4 to 77.5)                                   | 90.6 (88.5 to 92.6)                                   | 66.8 (51.5 to 81.8)                                 |
| Correct classification                               | 45.7 (43.8 to 47.6)                                   | 69.6 (68.1 to 71.1)                                    | 63.6 (60 to 67.3)                                    | 44.8 (42.5 to 47.2)                                   | 67.4 (64.1 to 70.6)                                   | 51.4 (35.7 to 67.3)                                 |
| <b>eGFR<sub>cr-cys</sub></b>                         |                                                       |                                                        |                                                      |                                                       |                                                       |                                                     |
| Bias, median difference (ml/min/1.73m <sup>2</sup> ) | 0.4 (0 to 0.8)                                        | 4.5 (4 to 5)                                           | 1.7 (0.9 to 2.2)                                     | 1.4 (0.8 to 2)                                        | 7.1 (6.4 to 7.7)                                      | 7.3 (3.1 to 12.6)                                   |
| P <sub>30</sub>                                      | 83.6 (82.2 to 85)                                     | 88.9 (87.8 to 89.9)                                    | 88 (85.5 to 90.4)                                    | 85.5 (83.8 to 87.1)                                   | 85.8 (83.3 to 88.2)                                   | 84.7 (72.5 to 95.1)                                 |
| Correct classification                               | 61.3 (59.5 to 63.1)                                   | 69.1 (67.5 to 70.6)                                    | 73.3 (69.9 to 76.6)                                  | 62.1 (59.8 to 64.4)                                   | 65.3 (62 to 68.6)                                     | 48.8 (33.3 to 64.6)                                 |

|                                                      | No cancer (N = 6740)                                  |                                                        |                                                      | Cancer (N = 2664)                                     |                                                        |                                                      |
|------------------------------------------------------|-------------------------------------------------------|--------------------------------------------------------|------------------------------------------------------|-------------------------------------------------------|--------------------------------------------------------|------------------------------------------------------|
|                                                      | eGFR <sub>cys</sub> <eGFR <sub>cr</sub><br>(N = 3034) | eGFR <sub>cys</sub> ≈ eGFR <sub>cr</sub><br>(N = 3103) | eGFR <sub>cys</sub> >eGFR <sub>cr</sub><br>(N = 603) | eGFR <sub>cys</sub> <eGFR <sub>cr</sub><br>(N = 1431) | eGFR <sub>cys</sub> ≈ eGFR <sub>cr</sub><br>(N = 1123) | eGFR <sub>cys</sub> >eGFR <sub>cr</sub><br>(N = 110) |
| <b>eGFR<sub>cr</sub></b>                             |                                                       |                                                        |                                                      |                                                       |                                                        |                                                      |
| Bias, median difference (ml/min/1.73m <sup>2</sup> ) | 15 (14.5 to 15.6)                                     | 4.7 (4.2 to 5.3)                                       | -4.4 (-5.3 to -3.7)                                  | 14.9 (14.2 to 15.7)                                   | 3.7 (2.9 to 4.4)                                       | -5.3 (-7.7 to -3.1)                                  |
| P <sub>30</sub>                                      | 47.2 (45.4 to 48.9)                                   | 84.7 (83.4 to 86)                                      | 85.2 (82.4 to 88)                                    | 55.2 (52.6 to 57.8)                                   | 89.4 (87.6 to 91.2)                                    | 89.1 (83 to 94.5)                                    |
| Correct classification                               | 38.1 (36.4 to 39.8)                                   | 65.8 (64.2 to 67.4)                                    | 62.4 (58.6 to 66.2)                                  | 38 (35.5 to 40.5)                                     | 68.3 (65.5 to 71)                                      | 59.1 (50 to 68.1)                                    |
| <b>eGFR<sub>cys</sub></b>                            |                                                       |                                                        |                                                      |                                                       |                                                        |                                                      |
| Bias, median difference (ml/min/1.73m <sup>2</sup> ) | -7.6 (-8 to -7.2)                                     | 2.6 (2.2 to 3)                                         | 7.6 (6.4 to 8.9)                                     | -11.2 (-12.1 to -10.4)                                | 0.5 (-0.1 to 1.2)                                      | 11.9 (10 to 15)                                      |
| P <sub>30</sub>                                      | 74 (72.4 to 75.5)                                     | 89.5 (88.4 to 90.6)                                    | 71 (67.4 to 74.5)                                    | 70.7 (68.4 to 73)                                     | 93 (91.4 to 94.4)                                      | 76.4 (68.1 to 84.2)                                  |
| Correct classification                               | 48 (46.2 to 49.7)                                     | 69.1 (67.5 to 70.8)                                    | 62.8 (58.9 to 66.7)                                  | 39.9 (37.4 to 42.5)                                   | 69.3 (66.5 to 71.9)                                    | 63.6 (54.4 to 72.5)                                  |
| <b>eGFR<sub>cr-cys</sub></b>                         |                                                       |                                                        |                                                      |                                                       |                                                        |                                                      |
| Bias, median difference (ml/min/1.73m <sup>2</sup> ) | 1.2 (0.8 to 1.6)                                      | 5.1 (4.6 to 5.6)                                       | 1.4 (0.8 to 2)                                       | -0.3 (-0.9 to 0.2)                                    | 4.6 (3.6 to 5.3)                                       | 5.4 (3.4 to 7)                                       |
| P <sub>30</sub>                                      | 82.6 (81.3 to 83.9)                                   | 87.5 (86.4 to 88.7)                                    | 88.4 (85.8 to 90.9)                                  | 88 (86.2 to 89.6)                                     | 90.5 (88.7 to 92.1)                                    | 84.6 (77.7 to 91)                                    |
| Correct classification                               | 61.4 (59.7 to 63.2)                                   | 68.4 (66.8 to 70)                                      | 71.9 (68.4 to 75.5)                                  | 62 (59.5 to 64.5)                                     | 68.2 (65.4 to 70.9)                                    | 71.8 (63.3 to 80)                                    |

**Supplemental Table S7.** Baseline characteristics of included individuals (n=6185) with measured GFR measurements (n=9404) in Stockholm during 2007-2018, stratified by raw discordance between eGFR<sub>cr</sub> and eGFR<sub>cys</sub>.

|                                                    | eGFR <sub>cys</sub> <eGFR <sub>cr</sub>                                         | eGFR <sub>cys</sub> ≈ eGFR <sub>cr</sub>                                      | eGFR <sub>cys</sub> >eGFR <sub>cr</sub>                                          |
|----------------------------------------------------|---------------------------------------------------------------------------------|-------------------------------------------------------------------------------|----------------------------------------------------------------------------------|
|                                                    | eGFR <sub>cys</sub> >15 ml/min/1.73m <sup>2</sup> lower than eGFR <sub>cr</sub> | eGFR <sub>cys</sub> within 15 ml/min/1.73m <sup>2</sup> of eGFR <sub>cr</sub> | eGFR <sub>cys</sub> >15 ml/min/1.73m <sup>2</sup> higher than eGFR <sub>cr</sub> |
| Number of persons, n (%) <sup>*</sup>              | 2575 (42)                                                                       | 3692 (60)                                                                     | 476 (8)                                                                          |
| Number of measurements, n (%)                      | 3884 (41)                                                                       | 4999 (53)                                                                     | 521 (6)                                                                          |
| Mean age (SD), y                                   | 57 (17)                                                                         | 57 (17)                                                                       | 44 (15)                                                                          |
| Age ≥65 years, n (%)                               | 1579 (41)                                                                       | 1940 (39)                                                                     | 50 (10)                                                                          |
| Female sex, n (%)                                  | 1370 (35)                                                                       | 2163 (43)                                                                     | 218 (42)                                                                         |
| Mean BMI (SD), kg/m <sup>2</sup>                   | 26 (5)                                                                          | 26 (7)                                                                        | 26 (23)                                                                          |
| BMI ≥25 kg/m <sup>2</sup> , n (%) <sup>†</sup>     | 1602 (41)                                                                       | 2123 (42)                                                                     | 162 (31)                                                                         |
| GFR measurements, median (IQR)                     |                                                                                 |                                                                               |                                                                                  |
| Creatinine, μmol/L <sup>‡</sup>                    | 84 [69, 107]                                                                    | 107 [80, 160]                                                                 | 94 [80, 110]                                                                     |
| Cystatin C, mg/L                                   | 1 [1, 2]                                                                        | 1 [1, 2]                                                                      | 1 [1, 1]                                                                         |
| eGFR <sub>cr</sub> , ml/min/1.73m <sup>2</sup>     | 84 [63, 101]                                                                    | 62 [36, 92]                                                                   | 80 [68, 93]                                                                      |
| eGFR <sub>cys</sub> , ml/min/1.73m <sup>2</sup>    | 50 [35, 68]                                                                     | 58 [31, 90]                                                                   | 107 [92, 118]                                                                    |
| eGFR <sub>cr-cys</sub> , ml/min/1.73m <sup>2</sup> | 64 [46, 83]                                                                     | 60 [33, 94]                                                                   | 96 [83, 109]                                                                     |
| Measured GFR, ml/min/1.73m <sup>2</sup>            | 62 [46, 80]                                                                     | 58 [33, 84]                                                                   | 88 [76, 99]                                                                      |
| Measured GFR categories, n (%)                     |                                                                                 |                                                                               |                                                                                  |
| ≥90                                                | 556 (14)                                                                        | 959 (19)                                                                      | 240 (46)                                                                         |
| 60 to <90                                          | 1538 (40)                                                                       | 1459 (29)                                                                     | 248 (48)                                                                         |
| 45 to <60                                          | 875 (23)                                                                        | 783 (16)                                                                      | 19 (4)                                                                           |
| 30 to <45                                          | 620 (16)                                                                        | 717 (14)                                                                      | 7 (1)                                                                            |
| 15 to <30                                          | 269 (7)                                                                         | 748 (15)                                                                      | 3 (1)                                                                            |
| <15                                                | 26 (1)                                                                          | 333 (7)                                                                       | 4 (1)                                                                            |
| Medical history, n (%)                             | 0 (0)                                                                           | 0 (0)                                                                         | 0 (0)                                                                            |
| Cardiovascular disease <sup>  </sup>               | 1315 (34)                                                                       | 1423 (28)                                                                     | 49 (9)                                                                           |
| Heart failure                                      | 462 (12)                                                                        | 497 (10)                                                                      | 15 (3)                                                                           |
| Diabetes mellitus                                  | 1255 (32)                                                                       | 1204 (24)                                                                     | 31 (6)                                                                           |
| Cancer                                             | 1312 (34)                                                                       | 1258 (25)                                                                     | 94 (18)                                                                          |
| Liver disease                                      | 1568 (40)                                                                       | 927 (19)                                                                      | 26 (5)                                                                           |
| Kidney transplantation                             | 127 (3)                                                                         | 223 (4)                                                                       | 0 (0)                                                                            |
| Kidney donor                                       | 16 (0)                                                                          | 218 (4)                                                                       | 50 (10)                                                                          |

BMI = body mass index; COPD = chronic obstructive pulmonary disease; Cr = creatinine; cys = cystatin C; eGFR = estimated glomerular filtration rate; n = number; GFR = glomerular filtration rate; RASi = renin-angiotensin system inhibition (angiotensin-converting enzyme inhibitor or angiotensin receptor blocker); NSAIDs = non-steroidal anti-inflammatory drugs; y = years.

\* Adds up to >100% since an individual can contribute multiple mGFR measurements and therefore contribute to all three strata

<sup>†</sup> BMI was missing for 662 (17%) in the eGFR<sub>cys</sub><eGFR<sub>cr</sub> group, 846 (17%) in the eGFR<sub>cys</sub> ≈ eGFR<sub>cr</sub> group and 132 (25%) in the eGFR<sub>cys</sub>>eGFR<sub>cr</sub> group.

<sup>‡</sup> To convert plasma creatinine from μmol/L to mg/dL, multiply by 0.0113.

<sup>||</sup> Cardiovascular disease was defined as a composite of myocardial infarction, other ischemic heart disease, heart failure, stroke, other cerebrovascular disease, arrhythmia and peripheral vascular disease.



**Supplemental Table S8.** Bias, P<sub>30</sub>, IQR and correct classification of eGFR<sub>cr</sub>, eGFR<sub>cys</sub> and eGFR<sub>cr-cys</sub> overall, and stratified by raw discordance between eGFR<sub>cr</sub> and eGFR<sub>cys</sub>.

|                                                       | eGFR <sub>cys</sub> < eGFR <sub>cr</sub>                                        | eGFR <sub>cys</sub> ≈ eGFR <sub>cr</sub>                                      | eGFR <sub>cys</sub> > eGFR <sub>cr</sub>                                         |
|-------------------------------------------------------|---------------------------------------------------------------------------------|-------------------------------------------------------------------------------|----------------------------------------------------------------------------------|
|                                                       | eGFR <sub>cys</sub> >15 ml/min/1.73m <sup>2</sup> lower than eGFR <sub>cr</sub> | eGFR <sub>cys</sub> within 15 ml/min/1.73m <sup>2</sup> of eGFR <sub>cr</sub> | eGFR <sub>cys</sub> >15 ml/min/1.73m <sup>2</sup> higher than eGFR <sub>cr</sub> |
| <b>eGFR<sub>cr</sub><sup>‡</sup></b>                  |                                                                                 |                                                                               |                                                                                  |
| Bias, median difference (ml/min/1.73m <sup>2</sup> )* | 18.3 (17.8 to 18.8)                                                             | 3.6 (3.3 to 4)                                                                | -7.4 (-8.7 to -5.6)                                                              |
| P <sub>30</sub> <sup>†</sup>                          | 48 (46.5 to 49.6)                                                               | 82.3 (81.3 to 83.4)                                                           | 92.7 (90.4 to 94.9)                                                              |
| IQR, ml/min/1.73m <sup>2</sup> **                     | 16.9 (10.4 to 27.3)                                                             | 12.9 (-2.3 to 10.6)                                                           | 17.5 (-16.0 to 1.5)                                                              |
| Correct classification <sup>‡‡</sup>                  | 35.6 (34.1 to 37.2)                                                             | 65.2 (63.9 to 66.5)                                                           | 59.1 (55 to 63.3)                                                                |
| <b>eGFR<sub>cys</sub><sup>‡</sup></b>                 |                                                                                 |                                                                               |                                                                                  |
| Bias, median difference (ml/min/1.73m <sup>2</sup> )* | -9.5 (-10 to -9)                                                                | 0.8 (0.5 to 1.1)                                                              | 16.8 (15.5 to 17.9)                                                              |
| P <sub>30</sub> <sup>†</sup>                          | 74.7 (73.3 to 76.1)                                                             | 86.2 (85.2 to 87.1)                                                           | 72.8 (68.8 to 76.5)                                                              |
| IQR, ml/min/1.73m <sup>2</sup> **                     | 15.6 (-17.9 to -2.3)                                                            | 12.4 (-5.1 to 7.3)                                                            | 16.8 (8.1 to 24.9)                                                               |
| Correct classification <sup>‡‡</sup>                  | 44.9 (43.3 to 46.4)                                                             | 66.8 (65.5 to 68)                                                             | 61.2 (56.9 to 65.4)                                                              |
| <b>eGFR<sub>cr-cys</sub><sup>‡</sup></b>              |                                                                                 |                                                                               |                                                                                  |
| Bias, median difference (ml/min/1.73m <sup>2</sup> )* | 1.9 (1.5 to 2.4)                                                                | 2.5 (2.2 to 2.9)                                                              | 7.2 (5.4 to 8.6)                                                                 |
| P <sub>30</sub> <sup>†</sup>                          | 85.7 (84.6 to 86.8)                                                             | 86.8 (85.9 to 87.8)                                                           | 87.4 (84.4 to 90.2)                                                              |
| IQR, ml/min/1.73m <sup>2</sup> **                     | 14.7 (-5.2 to 9.4)                                                              | 12.5 (-2.6 to 9.9)                                                            | 18.1 (-1.8 to 16.3)                                                              |
| Correct classification <sup>‡‡</sup>                  | 61.6 (60.1 to 63.1)                                                             | 68 (66.7 to 69.3)                                                             | 69.8 (65.9 to 73.7)                                                              |

Cr = creatinine; cys = cystatin C; diff = difference; eGFR = estimated glomerular filtration rate; mGFR = measured glomerular filtration rate.

\* Bias was expressed as the median difference in estimated GFR minus measured GFR (95% confidence interval). A negative bias indicates underestimation of the measured GFR, and a

positive bias indicates overestimation of the measured GFR.

† P<sub>30</sub> was defined as the percentage of individuals with estimated GFRs within 30% of measured GFR (95% confidence interval).

‡ eGFR was calculated using the CKD-EPI 2012 and 2021 equations.

\*\* IQR is defined as the interquartile range and a measure of precision (the dispersion of individual errors around the median bias)

‡‡ Correct classification of GFR categories was defined as agreement of eGFR and mGFR categories using the KDIGO GFR categories (<15, 15-29, 30-44, 45-59, 60-89 and ≥90 ml/min/1.73m<sup>2</sup>).

**Supplemental Table S9. Sensitivity analysis restricting to same-day measurements of iohexol, creatinine and cystatin C (N = 7252).**

|                                                       | <b>eGFR<sub>cys</sub>&lt;eGFR<sub>cr</sub></b>         | <b>eGFR<sub>cys</sub> ≈ eGFR<sub>cr</sub></b>        | <b>eGFR<sub>cys</sub>&gt;eGFR<sub>cr</sub></b>          |
|-------------------------------------------------------|--------------------------------------------------------|------------------------------------------------------|---------------------------------------------------------|
|                                                       | eGFR <sub>cys</sub> >20% lower than eGFR <sub>cr</sub> | eGFR <sub>cys</sub> within 20% of eGFR <sub>cr</sub> | eGFR <sub>cys</sub> >20% higher than eGFR <sub>cr</sub> |
| <b>eGFR<sub>cr</sub><sup>‡</sup></b>                  |                                                        |                                                      |                                                         |
| Bias, median difference (ml/min/1.73m <sup>2</sup> )* | 15.5 (15 to 16.1)                                      | 4.7 (4.2 to 5.3)                                     | -5.5 (-7.3 to -4.4)                                     |
| P <sub>30</sub> <sup>†</sup>                          | 49 (47.3 to 50.7)                                      | 86.6 (85.5 to 87.8)                                  | 89.7 (86.9 to 92.2)                                     |
| IQR, ml/min/1.73m <sup>2</sup> **                     | 17.1 (7.6 to 24.7)                                     | 15.2 (-1.9 to 13.3)                                  | 13.3 (-14.2 to -0.8)                                    |
| Correct classification <sup>‡‡</sup>                  | 37.9 (36.2 to 39.5)                                    | 66.9 (65.3 to 68.5)                                  | 59.9 (55.5 to 64.2)                                     |
| <b>eGFR<sub>cys</sub><sup>‡</sup></b>                 |                                                        |                                                      |                                                         |
| Bias, median difference (ml/min/1.73m <sup>2</sup> )* | -8 (-8.4 to -7.7)                                      | 2.2 (1.8 to 2.6)                                     | 10.1 (8.8 to 11.6)                                      |
| P <sub>30</sub> <sup>†</sup>                          | 76.7 (75.2 to 78.1)                                    | 91.6 (90.6 to 92.5)                                  | 75.3 (71.4 to 79)                                       |
| IQR, ml/min/1.73m <sup>2</sup> **                     | 13.5 (-15.6 to -2.1)                                   | 13.8 (-3.9 to 9.9)                                   | 17.2 (2.8 to 19.9)                                      |
| Correct classification <sup>‡‡</sup>                  | 47.4 (45.7 to 49.1)                                    | 69.8 (68.3 to 71.4)                                  | 62.3 (58 to 66.5)                                       |
| <b>eGFR<sub>cr-cys</sub><sup>‡</sup></b>              |                                                        |                                                      |                                                         |
| Bias, median difference (ml/min/1.73m <sup>2</sup> )* | 1.2 (0.8 to 1.5)                                       | 5.3 (4.8 to 5.7)                                     | 2.4 (1.5 to 3.4)                                        |
| P <sub>30</sub> <sup>†</sup>                          | 85.5 (84.2 to 86.7)                                    | 89.4 (88.3 to 90.4)                                  | 89.9 (87.1 to 92.4)                                     |
| IQR, ml/min/1.73m <sup>2</sup> **                     | 12.2 (-4.5 to 7.6)                                     | 14.4 (-1.2 to 13.2)                                  | 13.7 (-3.1 to 10.6)                                     |
| Correct classification <sup>‡‡</sup>                  | 63.4 (61.7 to 65)                                      | 68.9 (67.3 to 70.5)                                  | 69.9 (65.9 to 73.8)                                     |

Cr = creatinine; cys = cystatin C; diff = difference; eGFR = estimated glomerular filtration rate; mGFR = measured glomerular filtration rate.

\* Bias was expressed as the median difference in estimated GFR minus measured GFR (95% confidence interval). A negative bias indicates underestimation of the measured GFR, and a positive bias indicates overestimation of the

measured GFR.

† P<sub>30</sub> was defined as the percentage of individuals with estimated GFRs within 30% of measured GFR (95% confidence interval).

‡ eGFR was calculated using the CKD-EPI 2012 and 2021 equations.

\*\* IQR is defined as the interquartile range and a measure of precision (the dispersion of individual errors around the median bias)

‡‡ Correct classification of GFR categories was defined as agreement of eGFR and mGFR categories using the KDIGO GFR categories (<15, 15-29, 30-44, 45-59, 60-89 and ≥90 ml/min/1.73m<sup>2</sup>).

**Supplemental Table S10. Sensitivity analysis restricting to first measurement for each patient (N = 6185).**

|                                                       | <b>eGFR<sub>cys</sub>&lt;eGFR<sub>cr</sub></b>         | <b>eGFR<sub>cys</sub> ≈ eGFR<sub>cr</sub></b>        | <b>eGFR<sub>cys</sub>&gt;eGFR<sub>cr</sub></b>          |
|-------------------------------------------------------|--------------------------------------------------------|------------------------------------------------------|---------------------------------------------------------|
|                                                       | eGFR <sub>cys</sub> >20% lower than eGFR <sub>cr</sub> | eGFR <sub>cys</sub> within 20% of eGFR <sub>cr</sub> | eGFR <sub>cys</sub> >20% higher than eGFR <sub>cr</sub> |
| <b>eGFR<sub>cr</sub><sup>‡</sup></b>                  |                                                        |                                                      |                                                         |
| Bias, median difference (ml/min/1.73m <sup>2</sup> )* | 13.9 (13.4 to 14.4)                                    | 3.6 (3.2 to 4)                                       | -4.9 (-6 to -4.2)                                       |
| P <sub>30</sub> <sup>†</sup>                          | 53.5 (51.6 to 55.3)                                    | 87.8 (86.5 to 89)                                    | 85.6 (82.6 to 88.5)                                     |
| IQR, ml/min/1.73m <sup>2</sup> **                     | 17.9 (5.8 to 23.7)                                     | 15.4 (-3.0 to 12.4)                                  | 13.4 (-14.3 to -0.9)                                    |
| Correct classification <sup>‡‡</sup>                  | 41.3 (39.5 to 43.1)                                    | 69.1 (67.4 to 70.7)                                  | 59.7 (55.6 to 63.7)                                     |
| <b>eGFR<sub>cys</sub><sup>‡</sup></b>                 |                                                        |                                                      |                                                         |
| Bias, median difference (ml/min/1.73m <sup>2</sup> )* | -10 (-10.5 to -9.5)                                    | 1.9 (1.5 to 2.3)                                     | 8 (6.6 to 9.7)                                          |
| P <sub>30</sub> <sup>†</sup>                          | 69.6 (67.9 to 71.4)                                    | 90.9 (89.9 to 91.9)                                  | 73.8 (70 to 77.4)                                       |
| IQR, ml/min/1.73m <sup>2</sup> **                     | 15.2 (-18.5 to -3.3)                                   | 14.3 (-4.5 to 9.9)                                   | 16.1 (2.3 to 18.4)                                      |
| Correct classification <sup>‡‡</sup>                  | 43.2 (41.3 to 45)                                      | 70.9 (69.3 to 72.6)                                  | 64.8 (60.7 to 68.7)                                     |
| <b>eGFR<sub>cr-cys</sub><sup>‡</sup></b>              |                                                        |                                                      |                                                         |
| Bias, median difference (ml/min/1.73m <sup>2</sup> )* | -0.1 (-0.6 to 0.3)                                     | 4.6 (4 to 5.1)                                       | 1.6 (0.8 to 2.1)                                        |
| P <sub>30</sub> <sup>†</sup>                          | 85.1 (83.7 to 86.4)                                    | 89.5 (88.4 to 90.6)                                  | 88.1 (85.3 to 90.7)                                     |
| IQR, ml/min/1.73m <sup>2</sup> **                     | 13.0 (-6.9 to 6.1)                                     | 15.0 (-1.9 to 13.2)                                  | 11.9 (-2.9 to 9.0)                                      |
| Correct classification <sup>‡‡</sup>                  | 62.6 (60.8 to 64.4)                                    | 70.4 (68.7 to 72)                                    | 72.2 (68.3 to 75.8)                                     |

Cr = creatinine; cys = cystatin C; diff = difference; eGFR = estimated glomerular filtration rate; mGFR = measured glomerular filtration rate.

\* Bias was expressed as the median difference in estimated GFR minus measured GFR (95% confidence interval). A negative bias indicates underestimation of the measured GFR, and a positive bias indicates overestimation of the

measured GFR.

† P<sub>30</sub> was defined as the percentage of individuals with estimated GFRs within 30% of measured GFR (95% confidence interval).

‡ eGFR was calculated using the CKD-EPI 2012 and 2021 equations.

\*\* IQR is defined as the interquartile range and a measure of precision (the dispersion of individual errors around the median bias)

‡‡ Correct classification of GFR categories was defined as agreement of eGFR and mGFR categories using the KDIGO GFR categories (<15, 15-29, 30-44, 45-59, 60-89 and ≥90 ml/min/1.73m<sup>2</sup>).

**Supplemental Table S11.** Sensitivity analysis restricting to measurements taken after 2011 (i.e., after standardization of cystatin C) (**N = 7277**).

|                                                       | <b>eGFR<sub>cys</sub> &lt; eGFR<sub>cr</sub></b>       | <b>eGFR<sub>cys</sub> ≈ eGFR<sub>cr</sub></b>        | <b>eGFR<sub>cys</sub> &gt; eGFR<sub>cr</sub></b>        |
|-------------------------------------------------------|--------------------------------------------------------|------------------------------------------------------|---------------------------------------------------------|
|                                                       | eGFR <sub>cys</sub> >20% lower than eGFR <sub>cr</sub> | eGFR <sub>cys</sub> within 20% of eGFR <sub>cr</sub> | eGFR <sub>cys</sub> >20% higher than eGFR <sub>cr</sub> |
| <b>eGFR<sub>cr</sub><sup>‡</sup></b>                  |                                                        |                                                      |                                                         |
| Bias, median difference (ml/min/1.73m <sup>2</sup> )* | 15.4 (14.8 to 15.9)                                    | 4.5 (4.1 to 5)                                       | -4.7 (-5.7 to -3.8)                                     |
| P <sub>30</sub> <sup>†</sup>                          | 48 (46.4 to 49.7)                                      | 86.1 (85 to 87.3)                                    | 87.1 (84.2 to 89.7)                                     |
| IQR, ml/min/1.73m <sup>2</sup> **                     | 17.5 (7.3 to 24.9)                                     | 14.6 (-1.6 to 13.0)                                  | 12.7 (-13.6 to -0.8)                                    |
| Correct classification <sup>‡‡</sup>                  | 37.3 (35.6 to 38.9)                                    | 66.4 (64.8 to 68.1)                                  | 62 (58.1 to 65.9)                                       |
| <b>eGFR<sub>cys</sub><sup>‡</sup></b>                 |                                                        |                                                      |                                                         |
| Bias, median difference (ml/min/1.73m <sup>2</sup> )* | -8.2 (-8.6 to -7.8)                                    | 2.2 (1.8 to 2.6)                                     | 7.7 (6.4 to 9.3)                                        |
| P <sub>30</sub> <sup>†</sup>                          | 74.8 (73.3 to 76.2)                                    | 90.6 (89.6 to 91.6)                                  | 73.4 (69.6 to 77)                                       |
| IQR, ml/min/1.73m <sup>2</sup> **                     | 13.5 (-15.5 to -2.0)                                   | 13.4 (-3.7 to 9.7)                                   | 15.9 (2.4 to 18.3)                                      |
| Correct classification <sup>‡‡</sup>                  | 47 (45.4 to 48.7)                                      | 69.5 (67.9 to 71)                                    | 63.6 (59.6 to 67.5)                                     |
| <b>eGFR<sub>cr-cys</sub><sup>‡</sup></b>              |                                                        |                                                      |                                                         |
| Bias, median difference (ml/min/1.73m <sup>2</sup> )* | 1.1 (0.7 to 1.4)                                       | 5 (4.5 to 5.5)                                       | 1.6 (0.9 to 2.2)                                        |
| P <sub>30</sub> <sup>†</sup>                          | 84.8 (83.5 to 86)                                      | 88.7 (87.6 to 89.7)                                  | 90 (87.5 to 92.4)                                       |
| IQR, ml/min/1.73m <sup>2</sup> **                     | 12.4 (-4.8 to 7.6)                                     | 14.0 (-1.1 to 12.9)                                  | 11.7 (-2.9 to 8.8)                                      |
| Correct classification <sup>‡‡</sup>                  | 62.5 (60.8 to 64.1)                                    | 68.3 (66.7 to 69.9)                                  | 72 (68.2 to 75.7)                                       |

Cr = creatinine; cys = cystatin C; diff = difference; eGFR = estimated glomerular filtration rate; mGFR = measured glomerular filtration rate.

\* Bias was expressed as the median difference in estimated GFR minus measured GFR (95% confidence interval). A negative bias indicates underestimation of the measured GFR, and a positive bias indicates overestimation of the

measured GFR.

† P<sub>30</sub> was defined as the percentage of individuals with estimated GFRs within 30% of measured GFR (95% confidence interval).

‡ eGFR was calculated using the CKD-EPI 2012 and 2021 equations.

\*\* IQR is defined as the interquartile range and a measure of precision (the dispersion of individual errors around the median bias)

‡‡ Correct classification of GFR categories was defined as agreement of eGFR and mGFR categories using the KDIGO GFR categories (<15, 15-29, 30-44, 45-59, 60-89 and ≥90 ml/min/1.73m<sup>2</sup>).

**Supplemental Table S12.** Sensitivity analysis restricting to the first measurement per patient, with standardized cystatin C measurements, and where iohexol, creatinine and cystatin C were measured on the same day (N = 3828).

|                                                       | <b>eGFR<sub>cys</sub>&lt;eGFR<sub>cr</sub></b>         | <b>eGFR<sub>cys</sub> ≈ eGFR<sub>cr</sub></b>        | <b>eGFR<sub>cys</sub>&gt;eGFR<sub>cr</sub></b>          |
|-------------------------------------------------------|--------------------------------------------------------|------------------------------------------------------|---------------------------------------------------------|
|                                                       | eGFR <sub>cys</sub> >20% lower than eGFR <sub>cr</sub> | eGFR <sub>cys</sub> within 20% of eGFR <sub>cr</sub> | eGFR <sub>cys</sub> >20% higher than eGFR <sub>cr</sub> |
| <b>eGFR<sub>cr</sub><sup>‡</sup></b>                  |                                                        |                                                      |                                                         |
| Bias, median difference (ml/min/1.73m <sup>2</sup> )* | 14.4 (13.8 to 15.4)                                    | 3.5 (3.1 to 4.1)                                     | -7.0 (-9.1 to -5.4)                                     |
| P <sub>30</sub> <sup>†</sup>                          | 50.7 (48.2 to 53.2)                                    | 88.5 (87.0 to 90.0)                                  | 89.9 (86.4 to 93.0)                                     |
| IQR, ml/min/1.73m <sup>2</sup> **                     | 17.8 (6.7 to 24.5)                                     | 15.4 (-3.0 to 12.4)                                  | 14.3 (-15.7 to -1.4)                                    |
| Correct classification <sup>‡‡</sup>                  | 40.5 (38.1 to 42.9)                                    | 69 (66.8 to 71.1)                                    | 56.6 (51.2 to 62.0)                                     |
| <b>eGFR<sub>cys</sub><sup>‡</sup></b>                 |                                                        |                                                      |                                                         |
| Bias, median difference (ml/min/1.73m <sup>2</sup> )* | -8.9 (-9.5 to -8.3)                                    | 1.9 (1.5 to 2.6)                                     | 8.8 (6.6 to 10.3)                                       |
| P <sub>30</sub> <sup>†</sup>                          | 74.7 (72.6 to 76.9)                                    | 92.6 (91.3 to 93.7)                                  | 78.2 (73.5 to 82.5)                                     |
| IQR, ml/min/1.73m <sup>2</sup> **                     | 13.9 (-16.5 to -2.6)                                   | 14.0 (-4.4 to 9.6)                                   | 16.4 (2.2 to 18.5)                                      |
| Correct classification <sup>‡‡</sup>                  | 46.8 (44.3 to 49.2)                                    | 71.7 (69.6 to 73.7)                                  | 65.7 (60.3 to 70.6)                                     |
| <b>eGFR<sub>cr-cys</sub><sup>‡</sup></b>              |                                                        |                                                      |                                                         |
| Bias, median difference (ml/min/1.73m <sup>2</sup> )* | 0.5 (0.2 to 1.0)                                       | 4.5 (3.8 to 5.0)                                     | 1.2 (0.4 to 2.4)                                        |
| P <sub>30</sub> <sup>†</sup>                          | 86.9 (85.2 to 88.5)                                    | 91.6 (90.3 to 92.8)                                  | 92.7 (89.6 to 95.3)                                     |
| IQR, ml/min/1.73m <sup>2</sup> **                     | 11.6 (-5.2 to 6.4)                                     | 14.5 (-1.9 to 12.6)                                  | 13.3 (-4.0 to 9.2)                                      |
| Correct classification <sup>‡‡</sup>                  | 64.6 (62.2 to 66.9)                                    | 70.4 (68.3 to 72.4)                                  | 69.0 (63.8 to 74.0)                                     |

Cr = creatinine; cys = cystatin C; diff = difference; eGFR = estimated glomerular filtration rate; mGFR = measured glomerular filtration rate.

\* Bias was expressed as the median difference in estimated GFR minus measured GFR (95% confidence interval). A negative bias indicates underestimation of the measured GFR, and a positive bias indicates overestimation of the

measured GFR.

† P<sub>30</sub> was defined as the percentage of individuals with estimated GFRs within 30% of measured GFR (95% confidence interval).

‡ eGFR was calculated using the CKD-EPI 2012 and 2021 equations.

\*\* IQR is defined as the interquartile range and a measure of precision (the dispersion of individual errors around the median bias)

‡‡ Correct classification of GFR categories was defined as agreement of eGFR and mGFR categories using the KDIGO GFR categories (<15, 15-29, 30-44, 45-59, 60-89 and ≥90 ml/min/1.73m<sup>2</sup>).

**Supplemental Table S13.** Sensitivity analysis using the average of eGFR<sub>cr</sub> and eGFR<sub>cys</sub> instead of eGFR<sub>cr-cys</sub>.

|                                                                    | <b>eGFR<sub>cys</sub>&lt;eGFR<sub>cr</sub></b>         | <b>eGFR<sub>cys</sub> ≈ eGFR<sub>cr</sub></b>        | <b>eGFR<sub>cys</sub>&gt;eGFR<sub>cr</sub></b>          |
|--------------------------------------------------------------------|--------------------------------------------------------|------------------------------------------------------|---------------------------------------------------------|
|                                                                    | eGFR <sub>cys</sub> >20% lower than eGFR <sub>cr</sub> | eGFR <sub>cys</sub> within 20% of eGFR <sub>cr</sub> | eGFR <sub>cys</sub> >20% higher than eGFR <sub>cr</sub> |
| <b>eGFR<sub>cr-cys</sub><sup>‡</sup></b>                           |                                                        |                                                      |                                                         |
| Bias, median difference (ml/min/1.73m <sup>2</sup> )*              | 0.7 (0.4 to 1)                                         | 5.0 (4.6 to 5.4)                                     | 1.8 (1.2 to 2.5)                                        |
| P <sub>30</sub> <sup>†</sup>                                       | 84.3 (83.2 to 85.4)                                    | 88.3 (87.3 to 89.3)                                  | 87.8 (85.4 to 90.2)                                     |
| IQR, ml/min/1.73m <sup>2</sup> **                                  | 13.6 (-3.5 to 10.0)                                    | 12.6 (-5.5 to 7.1)                                   | 14.5 (-1.4 to 13.2)                                     |
| Correct classification <sup>‡‡</sup>                               | 61.6 (60.2 to 63)                                      | 68.4 (67 to 69.7)                                    | 71.9 (68.6 to 75.2)                                     |
| <b>Average of eGFR<sub>cr</sub> eGFR<sub>cys</sub><sup>‡</sup></b> |                                                        |                                                      |                                                         |
| Bias, median difference (ml/min/1.73m <sup>2</sup> )*              | 2.9 (2.6 to 3.2)                                       | 3.4 (3 to 3.8)                                       | 1.2 (0.8 to 1.8)                                        |
| P <sub>30</sub> <sup>†</sup>                                       | 81.8 (80.6 to 82.9)                                    | 89.7 (88.8 to 90.7)                                  | 88.8 (86.5 to 91)                                       |
| IQR, ml/min/1.73m <sup>2</sup> **                                  | 12.7 (-3.2 to 9.6)                                     | 13.5 (-2.6 to 10.9)                                  | 11.1 (-3.6 to 7.5)                                      |
| Correct classification <sup>‡‡</sup>                               | 61.2 (59.8 to 62.6)                                    | 69.7 (68.3 to 71)                                    | 72.9 (69.6 to 76.1)                                     |

Cr = creatinine; cys = cystatin C; diff = difference; eGFR = estimated glomerular filtration rate; mGFR = measured glomerular filtration rate.

\* Bias was expressed as the median difference in estimated GFR minus measured GFR (95% confidence interval). A

negative bias indicates underestimation of the measured GFR, and a positive bias indicates overestimation of the measured GFR.

<sup>†</sup> P<sub>30</sub> was defined as the percentage of individuals with estimated GFRs within 30% of measured GFR (95% confidence interval).

<sup>‡</sup> eGFR was calculated using the CKD-EPI 2012 and 2021 equations.

**\*\* IQR is defined as the interquartile range and a measure of precision (the dispersion of individual errors around the median bias)**

**‡‡** Correct classification of GFR categories was defined as agreement of eGFR and mGFR categories using the KDIGO GFR categories (<15, 15-29, 30-44, 45-59, 60-89 and ≥90 ml/min/1.73m<sup>2</sup>).

Supplem

Dataset calendar period coverage  
[01-01-2006, 31-12-2019]

Allowed calendar date range for cohort entry  
[01-01-2007, 31-12-2018]

Cohort Entry Date [CED]

Exclusion: No calculated mGFR, mGFR <0 or >150  
ml/min/1.73m<sup>2</sup> [CED]

Exclusion: Age <18 years  
[CED]

Exclusion: On dialysis  
[CED]

Exclusion: Missing crea or  
cysC testing [-30, +30]

Covariates: Demographics (age, sex, calendar year,  
education)

Covariates: height, weight  
[-30, +30]

Covariates: Medication use  
[-183, CED]

Covariates: Comorbidities  
[-∞, CED]

Covariates: Cancer  
[-365, CED]

Covariates: Kidney donor  
[-365, +180]

**Supplemental Figure S2.** Flow chart of included participants in the study.

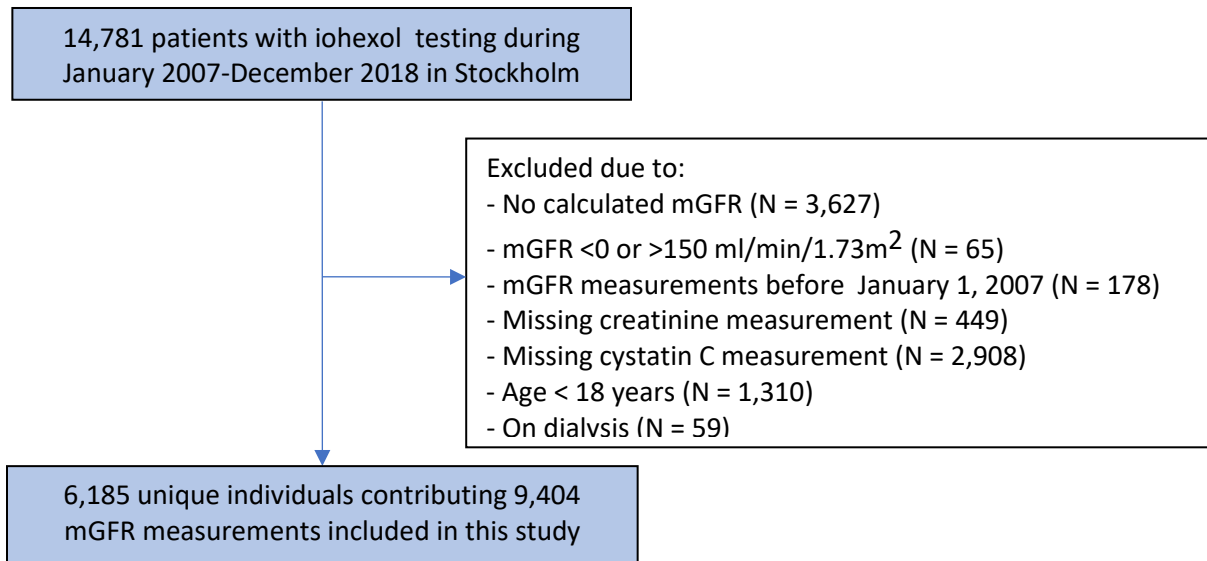



**Supplemental Figure S3.** Density plot of mGFR, eGFR<sub>cr</sub>, eGFR<sub>cys</sub> and eGFR<sub>cr-cys</sub> in the overall population, and stratified by discordance between eGFR<sub>cr</sub> and eGFR<sub>cys</sub>.

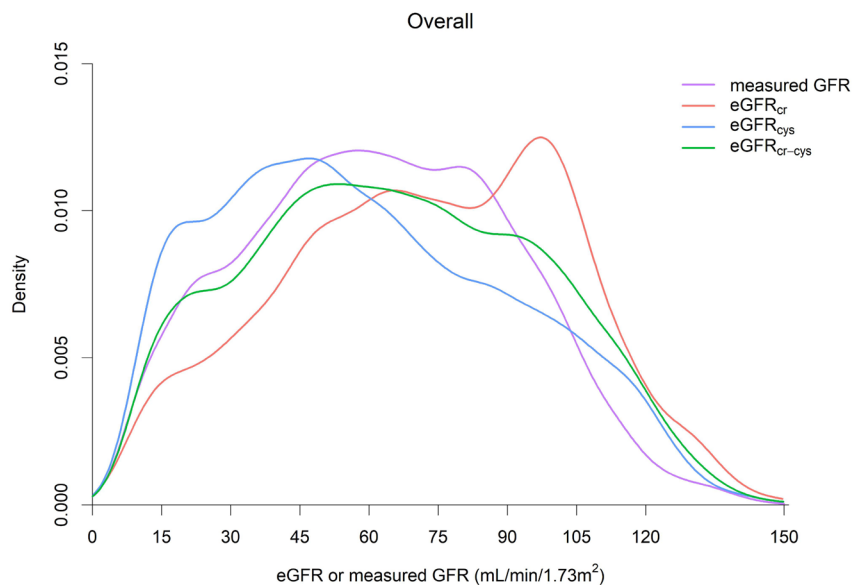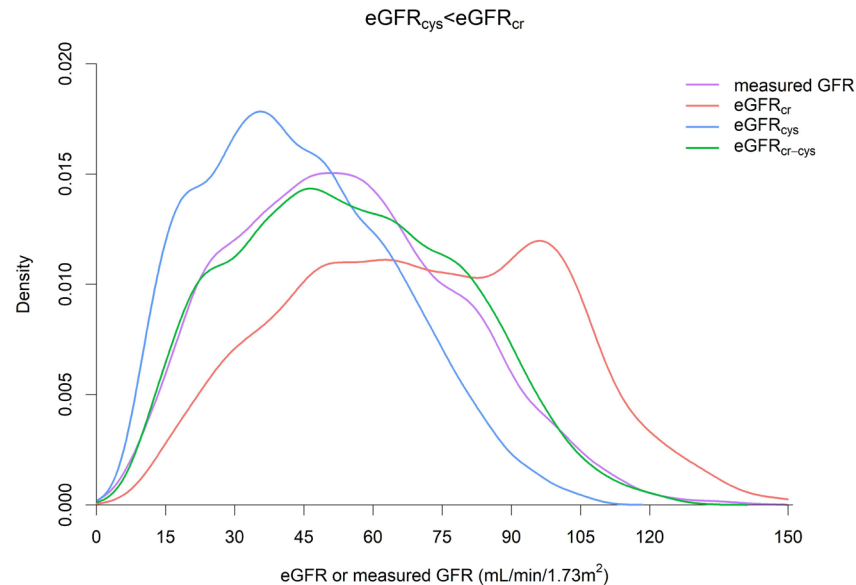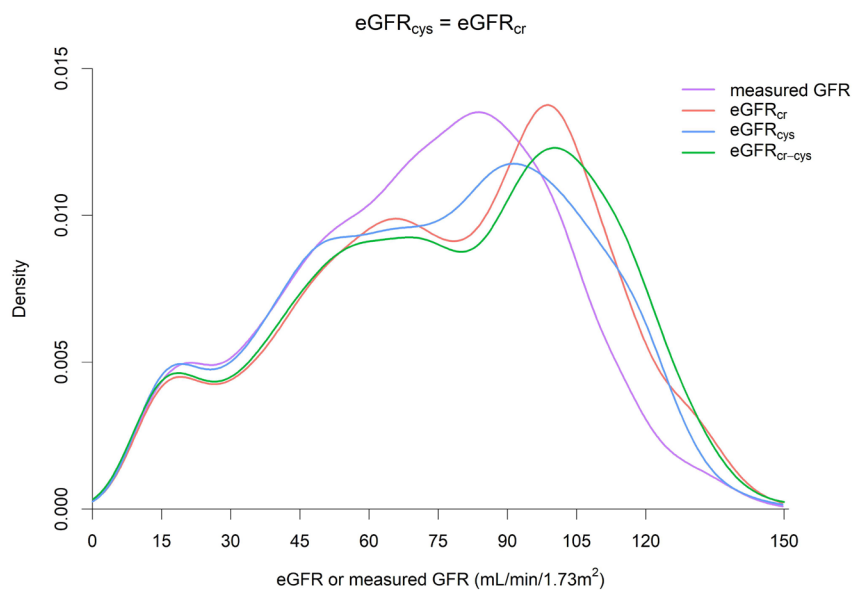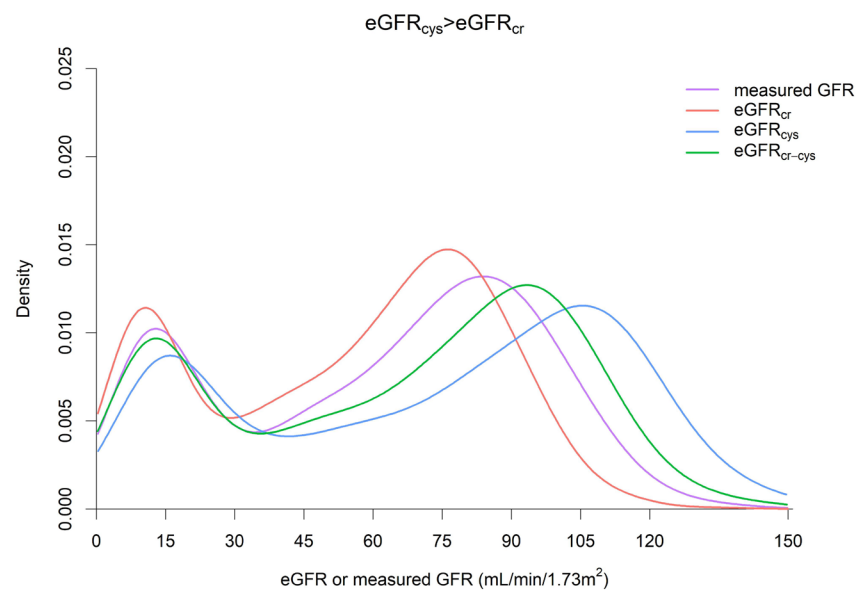

eGFR<sub>cr</sub> and eGFR<sub>cr-cys</sub> were calculated with the CKD-EPI 2021 equations, eGFR<sub>cys</sub> with the CKD-EPI 2012 equation.

**Supplemental Figure S4.** Density plot of discordance between  $eGFR_{cr}$  and  $eGFR_{cys}$  in the overall population.

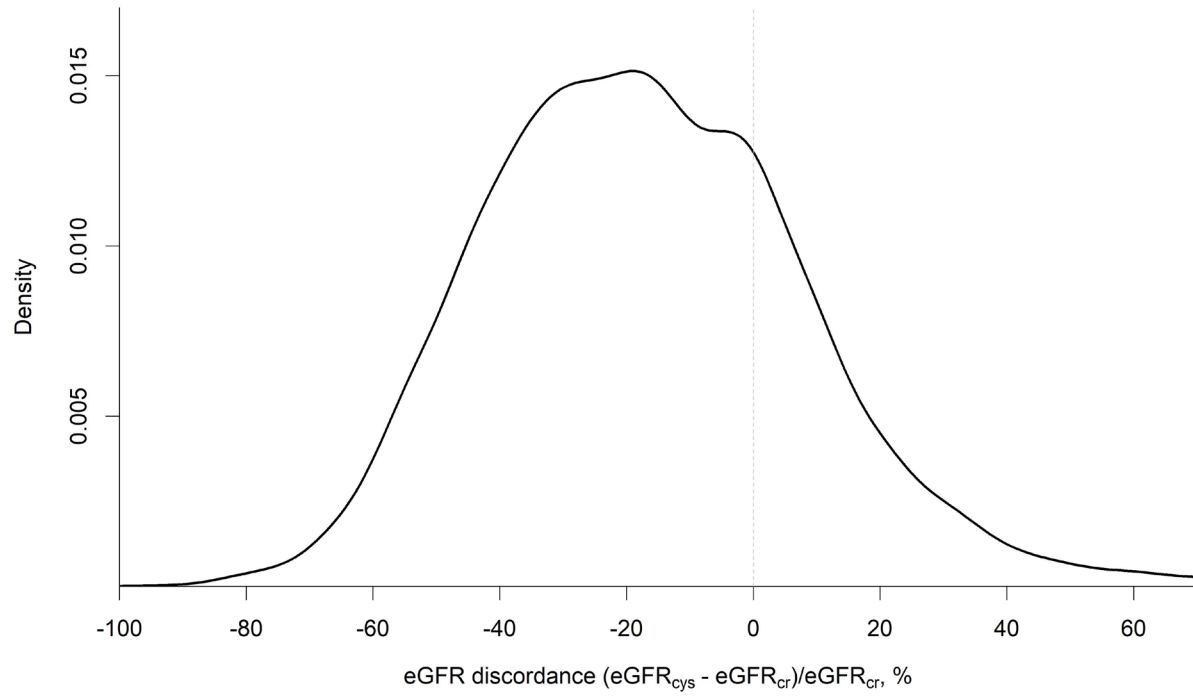

**Supplemental Figure S5.** Comparison of mGFR and eGFR among patients with (A)  $eGFR_{cys} < eGFR_{cr}$  (B)  $eGFR_{cys} \approx eGFR_{cr}$  and (C)  $eGFR_{cys} > eGFR_{cr}$ .

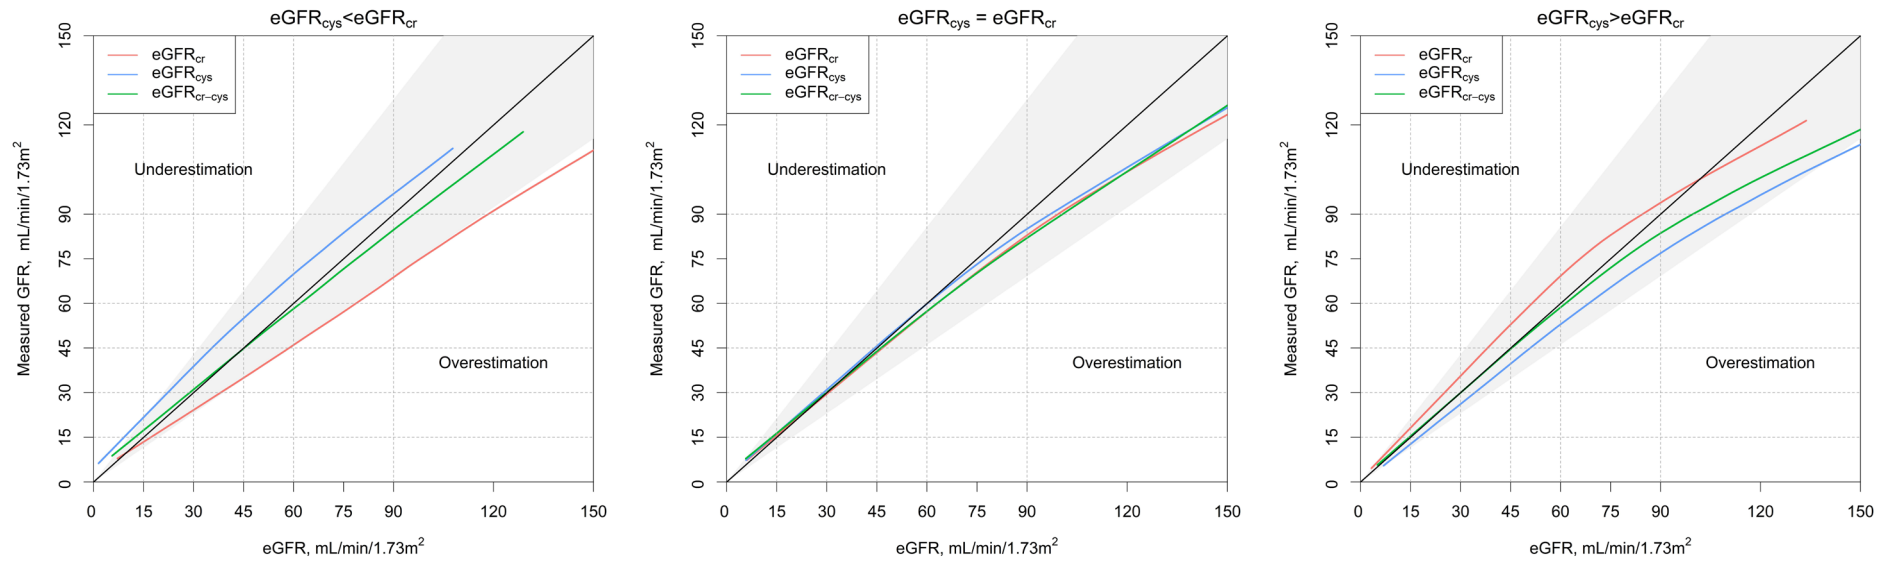

Colored lines represent Loess curves for  $eGFR_{cr}$ ,  $eGFR_{cys}$  and  $eGFR_{cr-cys}$ . Shaded area denotes  $P_{30}$ , i.e. eGFR within 30% of mGFR. A measurement fell within  $eGFR_{cys} < eGFR_{cr}$  when  $eGFR_{cys}$  was more than 20% *lower* than  $eGFR_{cr}$ ;  $eGFR_{cys} \approx eGFR_{cr}$  if the difference between eGFR values was within 20% of  $eGFR_{cr}$ ; and within  $eGFR_{cys} > eGFR_{cr}$  when  $eGFR_{cys}$  was more than 20% *higher* than  $eGFR_{cr}$ .

**Supplemental Figure S6.** Median bias for  $eGFR_{cr}$ ,  $eGFR_{cys}$  and  $eGFR_{cr-cys}$  across the range of discordance between  $eGFR_{cr}$  and  $eGFR_{cys}$ .

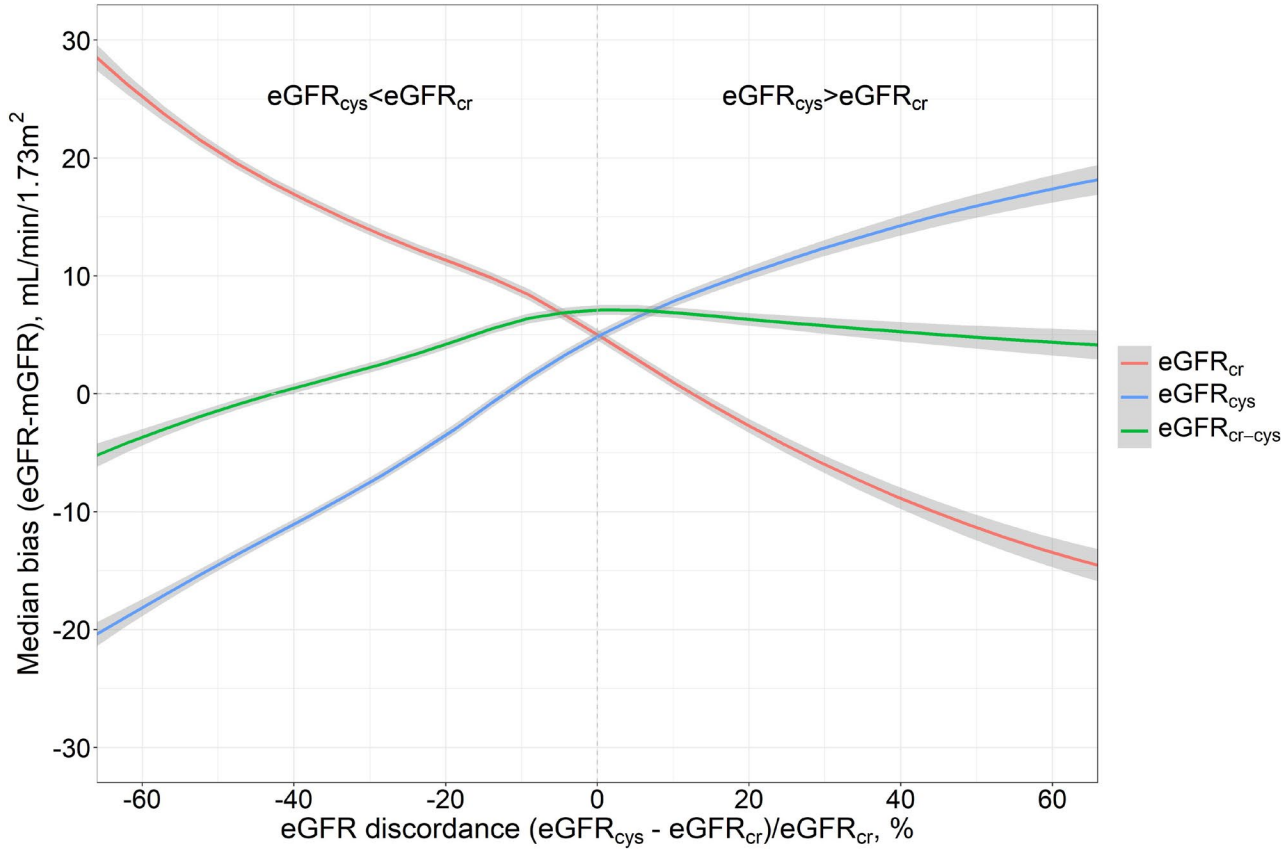

**Supplemental Figure S7.** Median bias for eGFR<sub>cr</sub>, eGFR<sub>cys</sub> and eGFR<sub>cr-cys</sub> across the range of BMI, overall and stratified by discordance between eGFR<sub>cr</sub> and eGFR<sub>cys</sub>.

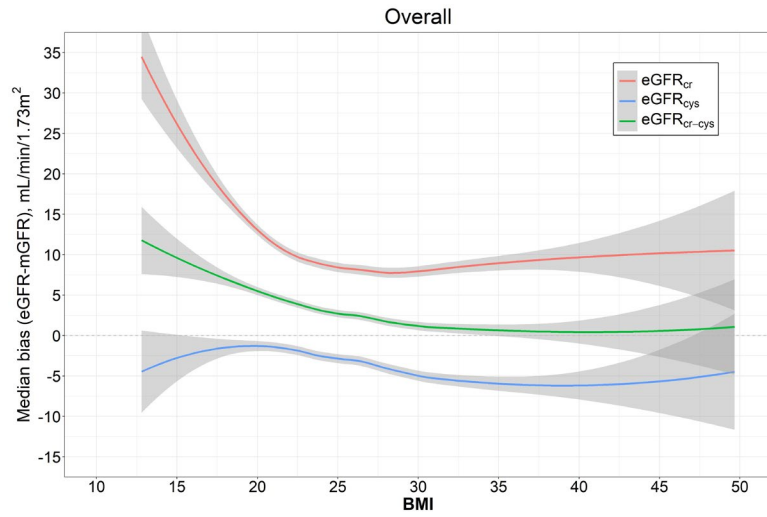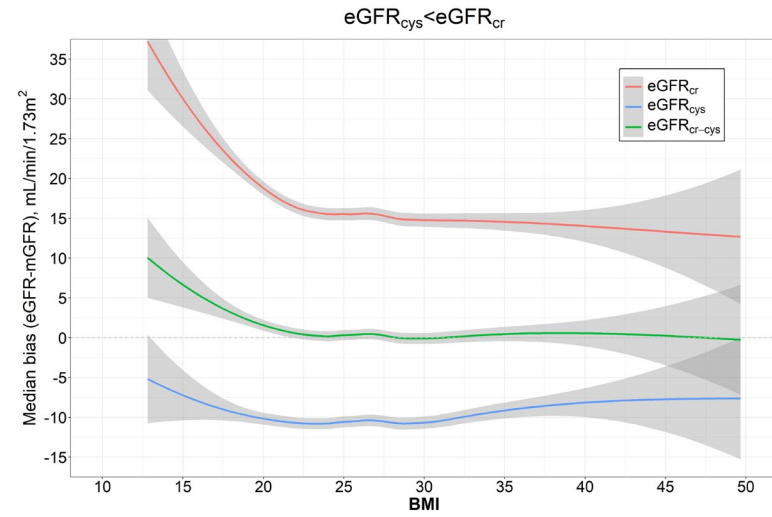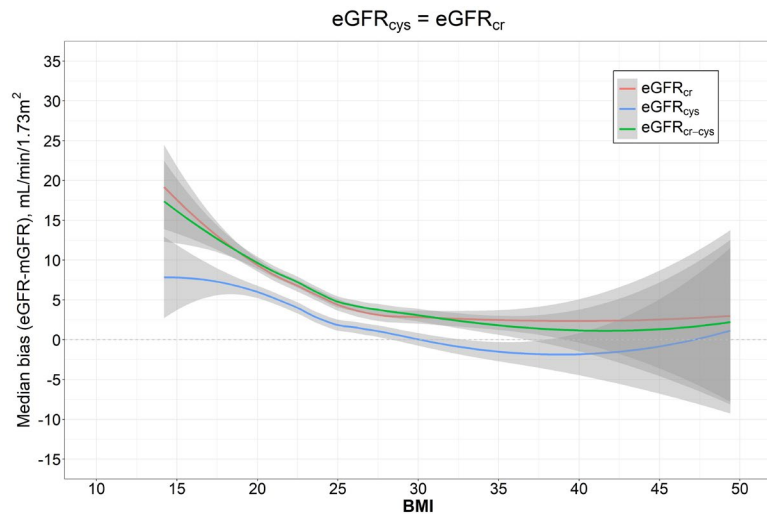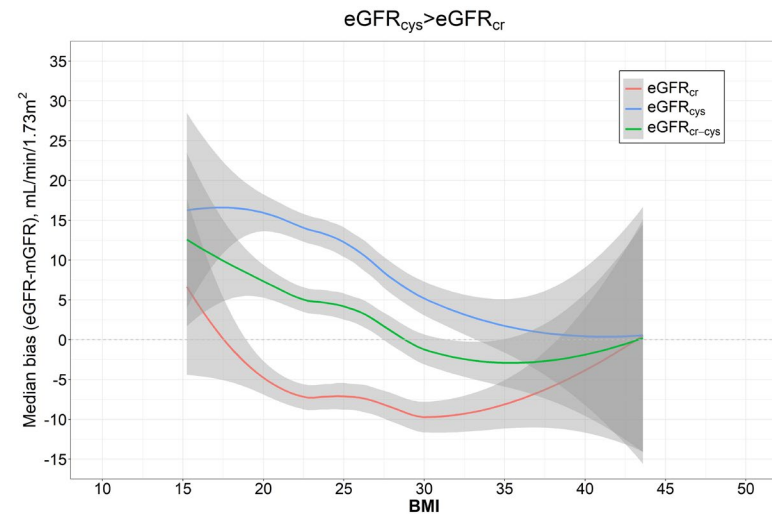

**Supplemental Figure S8.** Density plot of bias for the three eGFR equations stratified by absolute discordance between eGFR<sub>cr</sub> and eGFR<sub>cys</sub>.

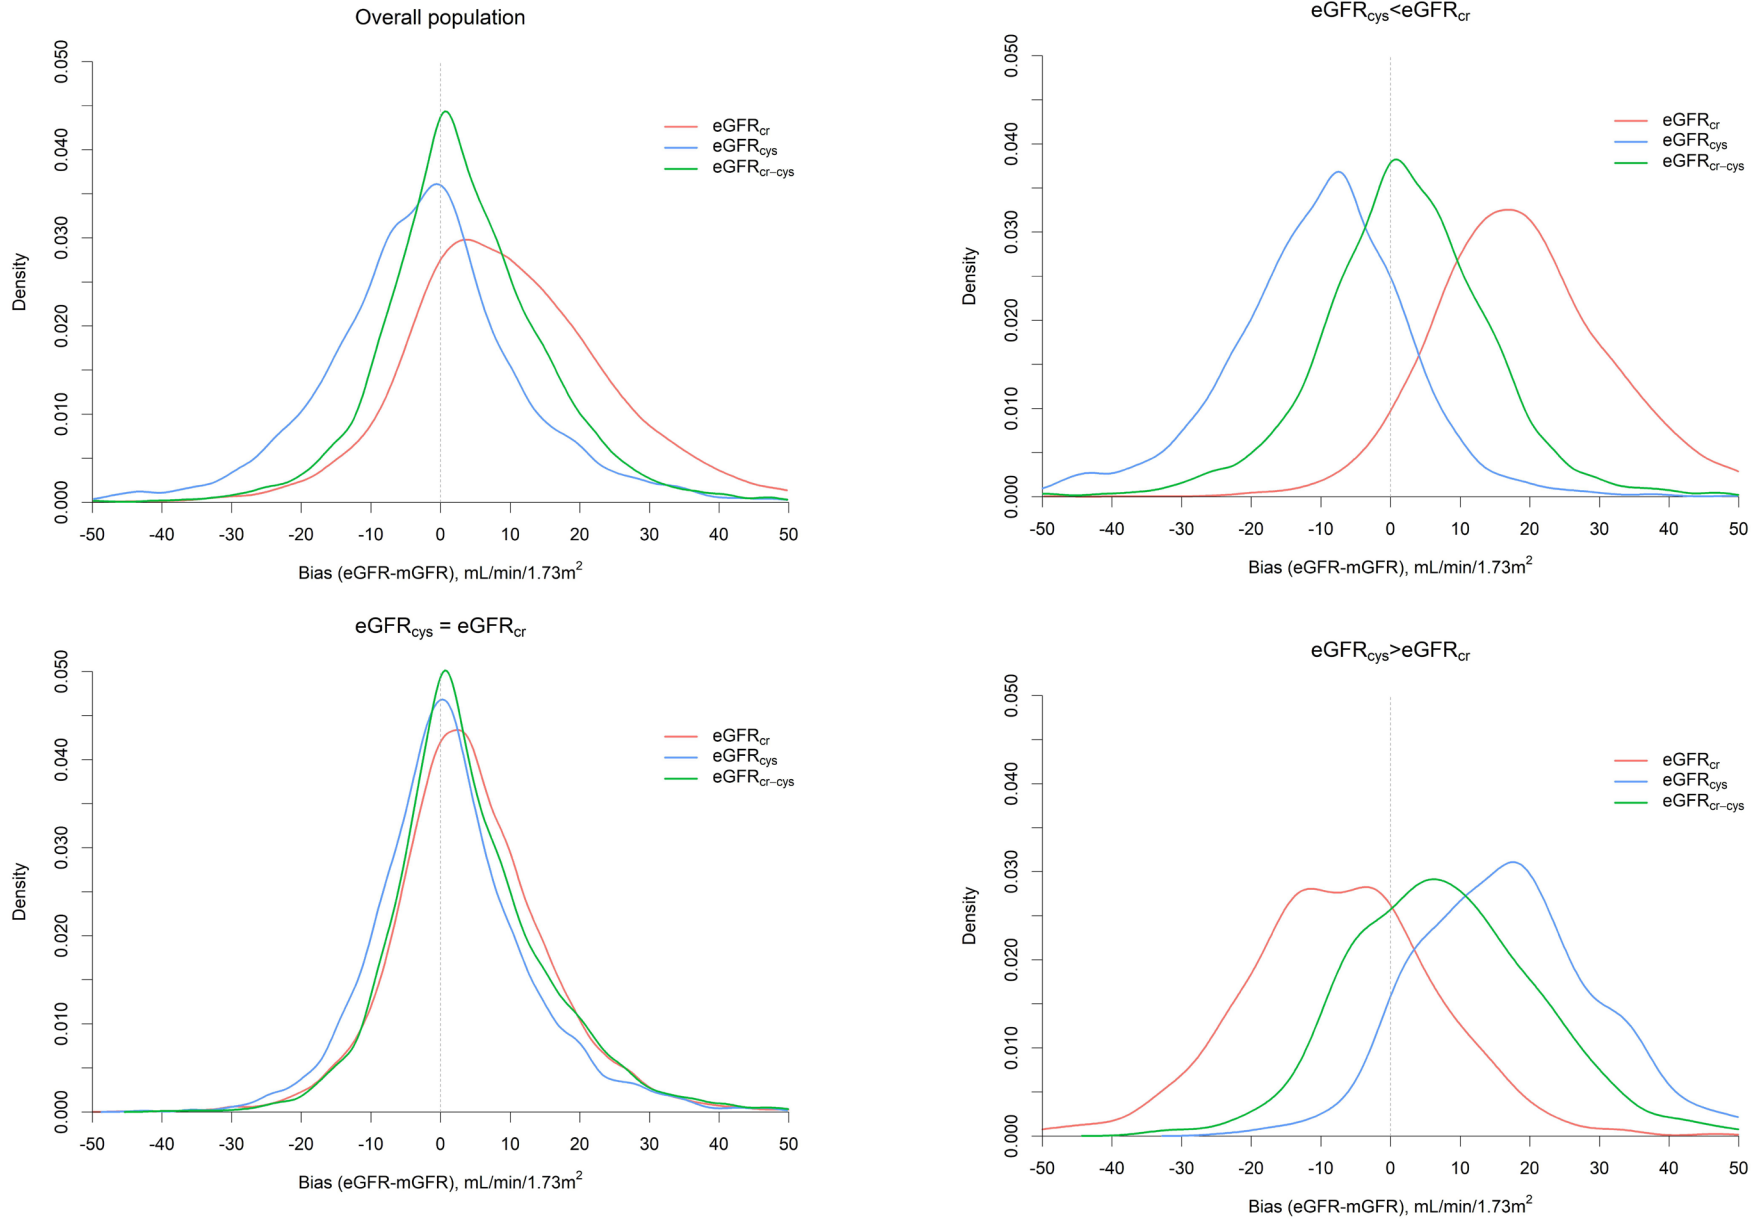

A measurement fell within eGFR<sub>cys</sub> < eGFR<sub>cr</sub> when eGFR<sub>cys</sub> was more than 20% lower than eGFR<sub>cr</sub>; eGFR<sub>cys</sub> ≈ eGFR<sub>cr</sub> if the difference between eGFR values was within 20% of eGFR<sub>cr</sub>; and within eGFR<sub>cys</sub> > eGFR<sub>cr</sub> when eGFR<sub>cys</sub> was more than 20% higher than eGFR<sub>cr</sub>.

**Supplemental Figure S9.** Bias of different CKD-EPI eGFR equations across subgroups, stratified by absolute discordance between eGFR<sub>cr</sub> and eGFR<sub>cys</sub>.

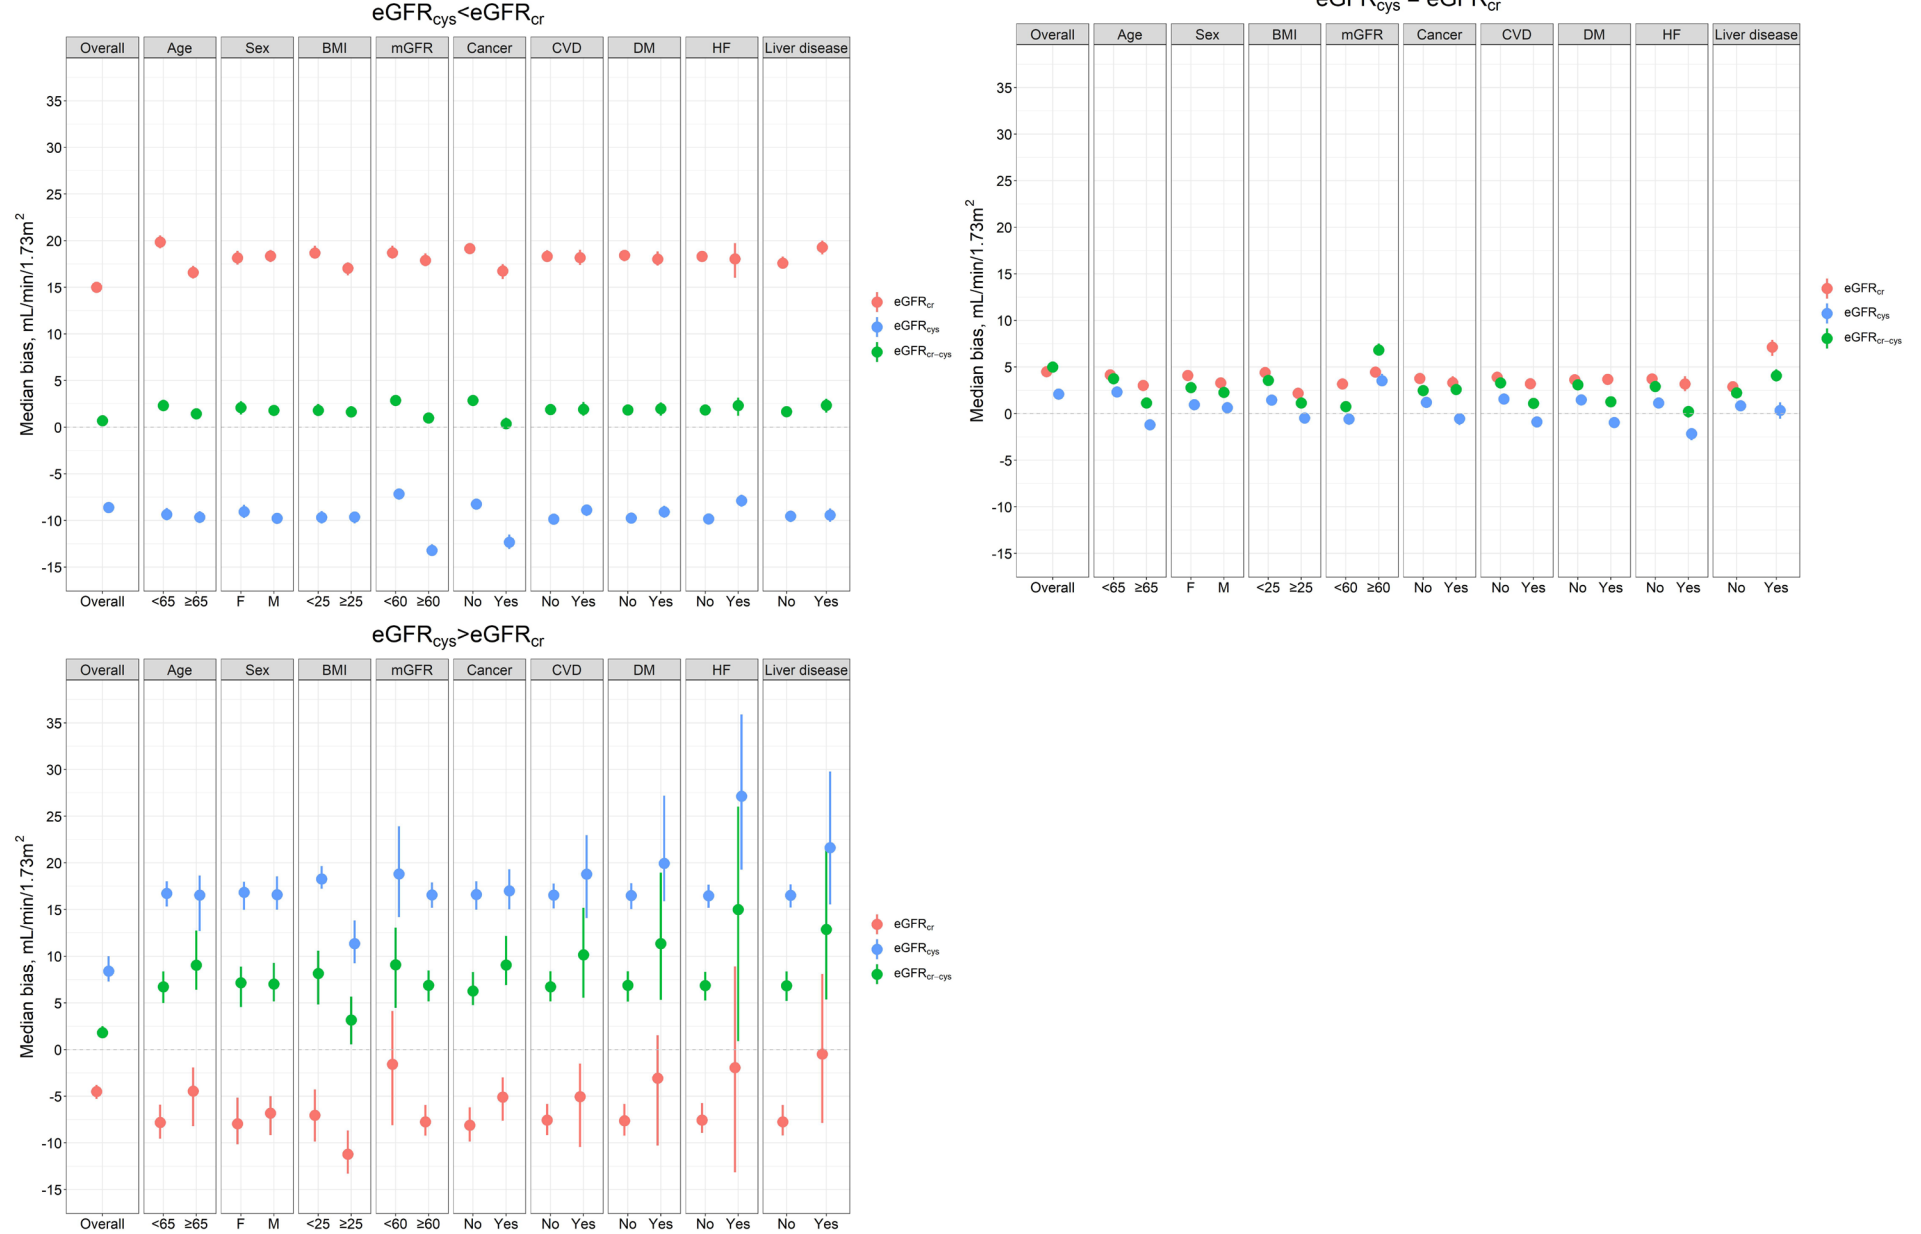

A measurement fell within eGFR<sub>cys</sub> < eGFR<sub>cr</sub> when eGFR<sub>cys</sub> was more than 20% lower than eGFR<sub>cr</sub>; eGFR<sub>cys</sub> ≈ eGFR<sub>cr</sub> if the difference between eGFR values was within 20% of eGFR<sub>cr</sub>; and within eGFR<sub>cys</sub> > eGFR<sub>cr</sub> when eGFR<sub>cys</sub> was more than 20% higher than eGFR<sub>cr</sub>.
